# Supplementary material for: A silver-mediated radical process of β-keto sulfones for the synthesis of 2,3-diacyl furans
Source: Royal Society of Chemistry journal article supplement (doi:10.1039/d3ob02079g), 2024-01-01
Supplement: d3ob02079g1.pdf [file d3ob02079g1.pdf]

## Supporting Information

### Silver-Mediated Radical Process of $\beta$ -Keto Sulfones for Synthesis of 2,3-Diacyl Furan

Jian Fan,<sup>\*a</sup> Yanhong Zu,<sup>a</sup> Zhimin Zheng,<sup>b</sup> Lulu Song,<sup>a</sup> Yating, Wang,<sup>a</sup>

Zhou Zhou,<sup>a</sup> Yujun Liu<sup>\*a</sup> and Shuwen Xu<sup>\*a</sup>

<sup>a</sup> Anhui Academy of Science and Technology, Hefei 230088, China.

<sup>b</sup> University of Science and Technology of China, Hefei 230026, China

|                                                             |         |
|-------------------------------------------------------------|---------|
| ◆ General Information and Procedure for the Reaction.....   | S2      |
| 1. General information.....                                 | S2      |
| 2. Optimization of reaction conditions.....                 | S2-S4   |
| 3. General procedure for synthesis of furan.....            | S4      |
| 4. Gram-scale reaction and derivatization.....              | S4-S6   |
| ◆ Analytic Data of Products.....                            | S6-S17  |
| ◆ Copies of <sup>1</sup> H and <sup>13</sup> C Spectra..... | S18-S44 |
| ◆ X-ray single crystal data of <b>2g</b> .....              | S45     |

---

\* Corresponding author. Tel.: +86 0551 65149890; Fax: +86 0551 65145209. E-mail address: jianF@ahnu.edu.cn

## 1. General information:

All commercial materials were used as received unless otherwise noted. Commercial reagents were purchased from Alfa Aesar, TCI, Energy Chemical, and used without further purification.  $^1\text{H}$  NMR spectra were recorded at 300 MHz, 400 MHz or 500 MHz NMR spectrometers using TMS as an internal standard,  $^{13}\text{C}$  NMR spectra were recorded at 100 MHz or 125 MHz NMR spectrometers using TMS as an internal standard and were fully decoupled by broad band proton decoupling. The multiplicities are reported as follows: singlet (s), doublet (d), doublet of doublets (dd), multiplet (m), triplet (t) and broad resonances (br). Melting points were measured on a hot-stage microscope (XT4-A) and are uncorrected. High resolution mass spectra (HRMS) were obtained on an APEXIM Fourier transform mass spectrometry (APCI).

## 2. Table S1 Optimization of reaction conditions

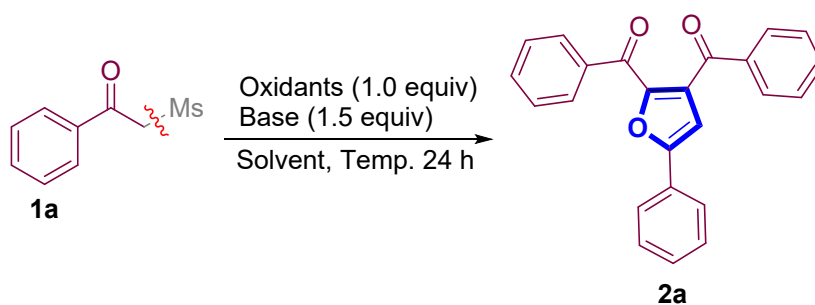

| Entry <sup>a</sup> | Oxidants                         | Base                    | Solvent | Temp. (°C) | Yield <sup>b</sup> (%) |
|--------------------|----------------------------------|-------------------------|---------|------------|------------------------|
| 1                  | $\text{Ag}_2\text{CO}_3$         | $\text{K}_2\text{CO}_3$ | DCE     | 90         | 80                     |
| 2                  | AgOAc                            | $\text{K}_2\text{CO}_3$ | DCE     | 90         | 65                     |
| 3                  | AgOTf                            | $\text{K}_2\text{CO}_3$ | DCE     | 90         | 71                     |
| 4                  | $\text{FeCl}_3$                  | $\text{K}_2\text{CO}_3$ | DCE     | 90         | trace                  |
| 5                  | $\text{Fe}(\text{OAc})_3$        | $\text{K}_2\text{CO}_3$ | DCE     | 90         | trace                  |
| 6                  | $\text{Cu}(\text{OAc})_2$        | $\text{K}_2\text{CO}_3$ | DCE     | 90         | trace                  |
| 7                  | CuBr                             | $\text{K}_2\text{CO}_3$ | DCE     | 90         | trace                  |
| 8                  | $\text{MnO}_4$                   | $\text{K}_2\text{CO}_3$ | DCE     | 90         | nr                     |
| 9                  | $\text{K}_2\text{S}_2\text{O}_8$ | $\text{K}_2\text{CO}_3$ | DCE     | 90         | nr                     |
| 10                 | TBHP                             | $\text{K}_2\text{CO}_3$ | DCE     | 90         | nr                     |
| 11                 | DTBP                             | $\text{K}_2\text{CO}_3$ | DCE     | 90         | nr                     |

|                 |                                 |                                 |                   |     |       |
|-----------------|---------------------------------|---------------------------------|-------------------|-----|-------|
| 12              | BQ                              | K <sub>2</sub> CO <sub>3</sub>  | DCE               | 90  | nr    |
| 13              | BPO                             | K <sub>2</sub> CO <sub>3</sub>  | DCE               | 90  | nr    |
| 14 <sup>c</sup> | Ag <sub>2</sub> CO <sub>3</sub> | K <sub>2</sub> CO <sub>3</sub>  | DCE               | 90  | 81    |
| 15 <sup>d</sup> | Ag <sub>2</sub> CO <sub>3</sub> | K <sub>2</sub> CO <sub>3</sub>  | DCE               | 90  | 68    |
| 16              | Ag <sub>2</sub> CO <sub>3</sub> | Na <sub>2</sub> CO <sub>3</sub> | DCE               | 90  | nr    |
| 17              | Ag <sub>2</sub> CO <sub>3</sub> | Cs <sub>2</sub> CO <sub>3</sub> | DCE               | 90  | nr    |
| 18              | Ag <sub>2</sub> CO <sub>3</sub> | KOAc                            | DCE               | 90  | 55    |
| 19              | Ag <sub>2</sub> CO <sub>3</sub> | KHCO <sub>3</sub>               | DCE               | 90  | 58    |
| 20 <sup>e</sup> | Ag <sub>2</sub> CO <sub>3</sub> | K <sub>2</sub> CO <sub>3</sub>  | DCE               | 90  | 82    |
| 21 <sup>f</sup> | Ag <sub>2</sub> CO <sub>3</sub> | K <sub>2</sub> CO <sub>3</sub>  | DCE               | 90  | 76    |
| 22              | Ag <sub>2</sub> CO <sub>3</sub> | K <sub>2</sub> CO <sub>3</sub>  | DCM               | 90  | 46    |
| 23              | Ag <sub>2</sub> CO <sub>3</sub> | K <sub>2</sub> CO <sub>3</sub>  | CHCl <sub>3</sub> | 90  | 20    |
| 24              | Ag <sub>2</sub> CO <sub>3</sub> | K <sub>2</sub> CO <sub>3</sub>  | toluene           | 90  | 58    |
| 25              | Ag <sub>2</sub> CO <sub>3</sub> | K <sub>2</sub> CO <sub>3</sub>  | THF               | 90  | trace |
| 26              | Ag <sub>2</sub> CO <sub>3</sub> | K <sub>2</sub> CO <sub>3</sub>  | DME               | 90  | nr    |
| 27              | Ag <sub>2</sub> CO <sub>3</sub> | K <sub>2</sub> CO <sub>3</sub>  | 1,4-dioxane       | 90  | trace |
| 28              | Ag <sub>2</sub> CO <sub>3</sub> | K <sub>2</sub> CO <sub>3</sub>  | DMSO              | 90  | 0     |
| 29              | Ag <sub>2</sub> CO <sub>3</sub> | K <sub>2</sub> CO <sub>3</sub>  | DMF               | 90  | 0     |
| 30              | Ag <sub>2</sub> CO <sub>3</sub> | K <sub>2</sub> CO <sub>3</sub>  | HFIP              | 90  | 0     |
| 31              | Ag <sub>2</sub> CO <sub>3</sub> | K <sub>2</sub> CO <sub>3</sub>  | DCE               | 80  | 71    |
| 32              | Ag <sub>2</sub> CO <sub>3</sub> | K <sub>2</sub> CO <sub>3</sub>  | DCE               | 70  | 57    |
| 33              | Ag <sub>2</sub> CO <sub>3</sub> | K <sub>2</sub> CO <sub>3</sub>  | DCE               | 100 | 79    |

<sup>a</sup> Reaction conditions: **1a** (59.4 mg, 0.3 mmol), Oxidants (1.0 equiv), Base (1.5 equiv), Solvent (2 mL), 24 h, air. <sup>b</sup> Isolated yield by flash column chromatography based on **1a**. <sup>c</sup> With 1.2 equiv. of Ag<sub>2</sub>CO<sub>3</sub>. <sup>d</sup> With 0.8 equiv. of Ag<sub>2</sub>CO<sub>3</sub>. <sup>e</sup> With 2.0 equiv. of K<sub>2</sub>CO<sub>3</sub>. <sup>f</sup> With 1.2 equiv. of K<sub>2</sub>CO<sub>3</sub>.

### Screening of Different Sulfonyl Leaving Groups

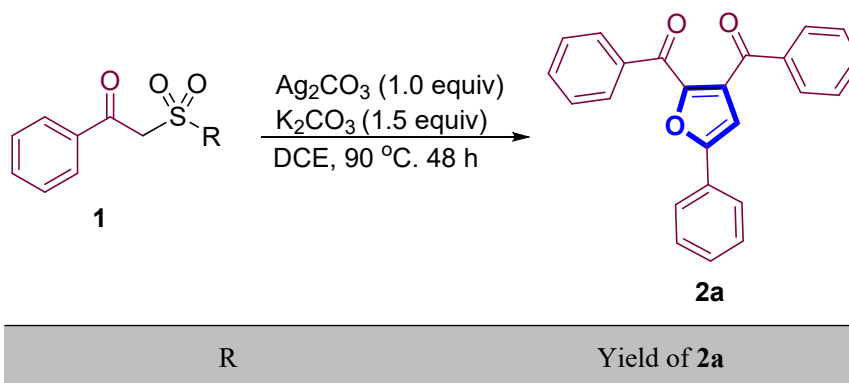

|                                                                                   |    |
|-----------------------------------------------------------------------------------|----|
| 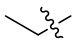 | 80 |
| 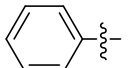 | 77 |
| 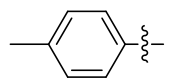 | 79 |
| 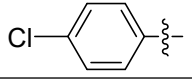 | 78 |

### 3. General procedure for synthesis of 2,3-diacylfurans

A mixture of  $\beta$ -Keto sulfone substrates (**1**, 0.3 mmol),  $\text{Ag}_2\text{CO}_3$  (0.3 mmol),  $\text{K}_2\text{CO}_3$  (0.45 mmol) and DCE (2.0 mL) was added to a 15 mL sealed tube. The tube was stirred at 90 °C (oil bath) for 24 h. Then, the reaction mixture was cooled to room temperature. The mixture was filtered through Celite®, and the filter cake was rinsed with EtOAc. The combined organic was removed in vacuo. Then the mixture was subjected to column chromatography on silica gel to give the desired product.

### 4. Gram-scale reaction and derivatization

#### Gram-scale preparation 2a and 2m

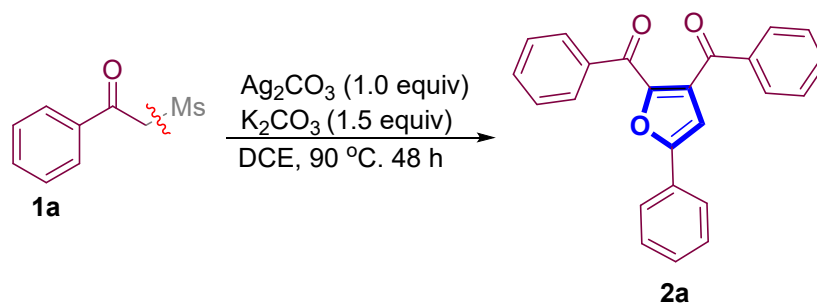

A 75 mL Schlenk tube was charged with 2-(methanesulfonyl)-1-phenylethan-1-one **1a** (10 mmol),  $\text{Ag}_2\text{CO}_3$  (10 mmol),  $\text{K}_2\text{CO}_3$  (15 mmol) and DCE (30 mL). The reaction mixture was stirred for 48 hours at 90 °C (oil bath). After that it was filtered through a short pad of Celite® and washed with ethyl acetate. The solvent was then evaporated under reduced pressure and the crude was purified by column chromatography on silica gel to afford the pure product **2a**.

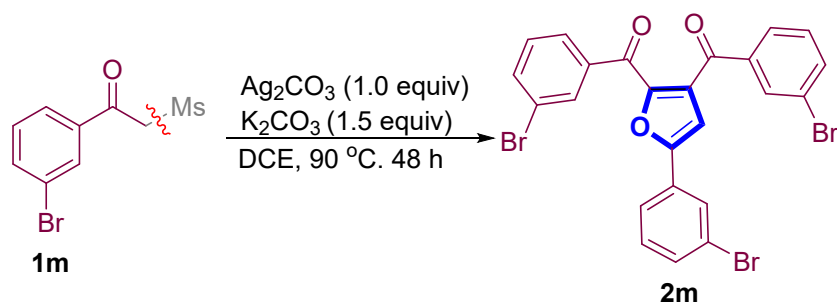

A 75 mL Schlenk tube was charged with 2 1-(3-bromophenyl)-2-(methylsulfonyl)ethan-1-one **1m** (10 mmol),  $\text{Ag}_2\text{CO}_3$  (10 mmol),  $\text{K}_2\text{CO}_3$  (15 mmol) and DCE (30 mL). The reaction mixture was stirred for 48 hours at 90 °C (oil bath). After that it was filtered through a short pad of Celite® and washed with ethyl acetate. The solvent was then evaporated under reduced pressure and the crude was purified by column chromatography on silica gel to afford the pure product **2m**.

#### Derivatization of product 2m

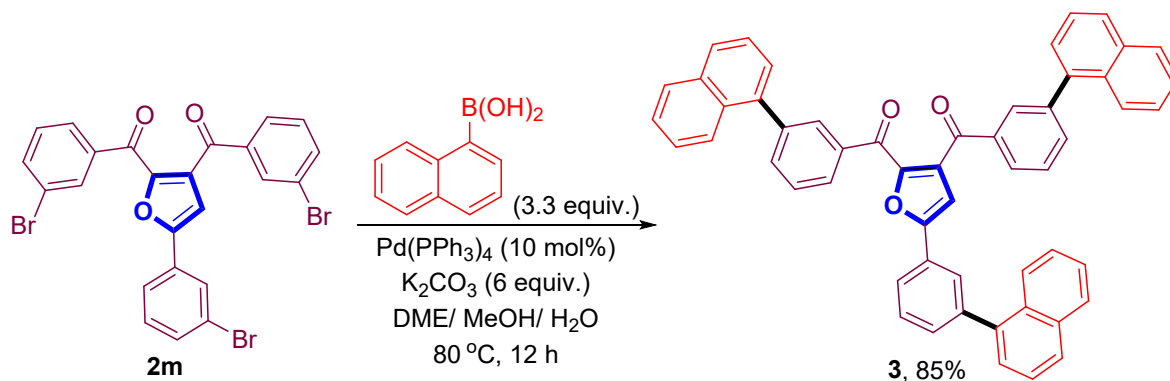

A Schlenk tube was charged with a solution of **2m** (0.1 mmol) and  $\text{Pd(PPh}_3)_4$  (0.01 mmol,) in DME (2 mL). A solution of  $\text{K}_2\text{CO}_3$  (1.2 mmol) in  $\text{H}_2\text{O}$  (0.5 mL) and a solution of the naphthalen-1-ylboronic acid (0.33 mmol) in MeOH (1 mL) were sequentially added. The reaction mixture was stirred at 80 °C overnight (oil bath). After cooling to room temperature, the reaction mixture was quenched with  $\text{H}_2\text{O}$  (5 mL) and extracted with  $\text{CH}_2\text{Cl}_2$  (3×5 mL). The combined organic layers were dried over  $\text{Na}_2\text{SO}_4$ , filtered, concentrated, and the residue was chromatographed on silica gel (petroleum ether:diethyl

ether 5:1) to yield in **3** (85% yield)

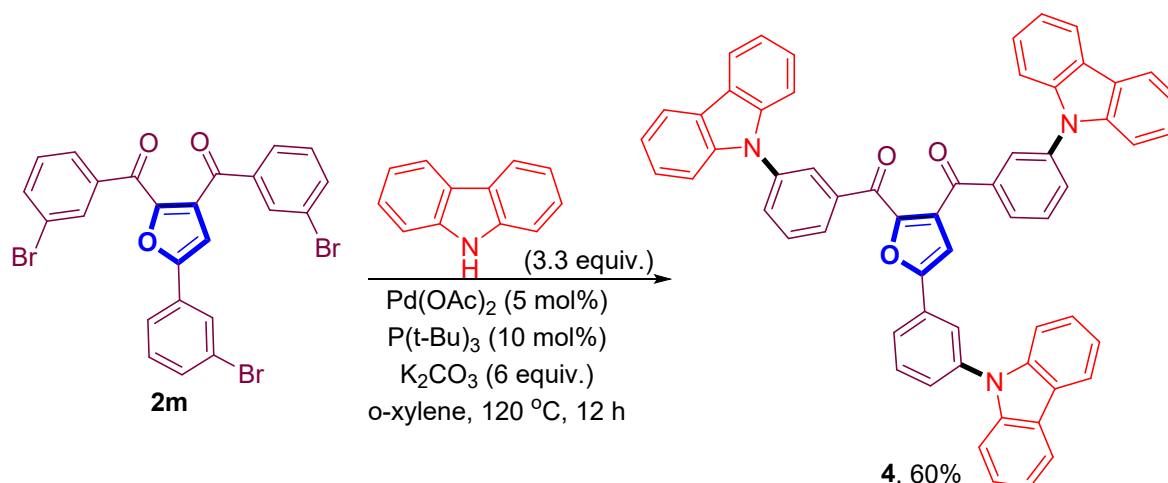

**2m** (0.2 mmol), Pd(OAc)<sub>2</sub> (5 mol%), P(t-Bu)<sub>3</sub> (10 mol%), K<sub>2</sub>CO<sub>3</sub> (1.2 mmol) and 9H-carbazole (0.66 mmol) were dissolved in o-xylene (2 ml) under Ar atmosphere, then the mixture was stirred at 120 °C for 12 hour. The solvent was removed in vacuo and the residue was chromatographed on silica gel (petroleum ether:diethyl ether 5:1) to yield in **4** (60% yield)

## Analytic Data of Products

(5-phenylfuran-2,3-diyl)bis(phenylmethanone) (**2a**)

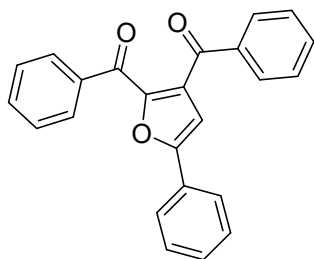

Yellow solid; m.p. 50-51 °C. (28.2 mg, 80% yield); <sup>1</sup>H NMR (500 MHz, CDCl<sub>3</sub>) δ 7.99-7.97 (m, 2H), 7.86-7.84 (m, 2H), 7.57-7.52 (m, 2H), 7.82-7.80 (m, 2H), 7.50-7.38 (m, 7H), 7.03 (s, 1H); <sup>13</sup>C NMR (125 MHz, CDCl<sub>3</sub>) δ 191.7, 182.1, 157.4, 149.4, 137.4, 137.1, 135.0, 134.0, 133.4, 130.2, 130.1, 129.7, 129.5, 129.1, 129.0, 128.8, 125.5, 108.5; HRMS (ESI) calculated for C<sub>24</sub>H<sub>17</sub>O<sub>3</sub> (M+H<sup>+</sup>): 353.1172, found: 353.1169.

(5-(p-tolyl)furan-2,3-diyl)bis(p-tolylmethanone) (**2b**)

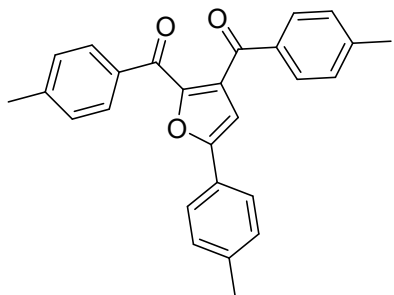

Yellow solid; m.p. 68-69 °C. (28.8 mg, 73% yield);  $^1\text{H}$  NMR (400 MHz,  $\text{CDCl}_3$ )  $\delta$  7.93 (d,  $J = 8.0$  Hz, 2H), 7.77 (d,  $J = 8.0$  Hz, 2H), 7.69 (d,  $J = 8.0$  Hz, 2H), 7.29-7.24 (m, 4H), 7.20 (d,  $J = 8.0$  Hz, 2H), 6.94 (s, 1H), 2.42-2.41 (m, 6H), 2.38 (s, 3H);  $^{13}\text{C}$  NMR (100 MHz,  $\text{CDCl}_3$ )  $\delta$  191.1, 181.2, 157.0, 148.9, 144.5, 143.8, 139.9, 134.7, 134.5, 134.2, 129.9, 129.8, 129.5, 129.3, 129.1, 126.2, 125.1, 107.5, 21.8, 21.7, 21.5; HRMS (ESI) calculated for  $\text{C}_{27}\text{H}_{23}\text{O}_3$  ( $\text{M}+\text{H}^+$ ): 395.1641, found: 395.1637.

(5-(4-methoxyphenyl)furan-2,3-diyl)bis((4-methoxyphenyl)methanone) (**2c**)

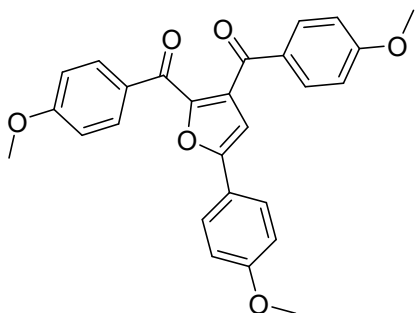

White solid; m.p. 44-46 °C. (23.6 mg, 76% yield);  $^1\text{H}$  NMR (500 MHz,  $\text{CDCl}_3$ )  $\delta$  8.06-8.04 (m, 2H), 7.87-7.85 (m, 2H), 7.75-7.73 (m, 2H), 7.01-6.99 (m, 2H), 6.95-6.93 (m, 2H), 6.88-6.87 (m, 2H), 6.86 (s, 1H), 3.88 (s, 3H), 3.87 (s, 3H), 3.84 (s, 3H);  $^{13}\text{C}$  NMR (125 MHz,  $\text{CDCl}_3$ )  $\delta$  190.5, 180.4, 164.3, 163.8, 161.1, 157.2, 148.9, 135.2, 132.4, 132.1, 130.5, 130.0, 127.0, 122.2, 114.9, 114.2, 114.1, 107.1, 55.9, 55.8; HRMS (ESI) calculated for  $\text{C}_{27}\text{H}_{23}\text{O}_6$  ( $\text{M}+\text{H}^+$ ): 443.1489, found: 443.1484.

(5-(4-fluorophenyl)furan-2,3-diyl)bis((4-fluorophenyl)methanone) (**2d**)

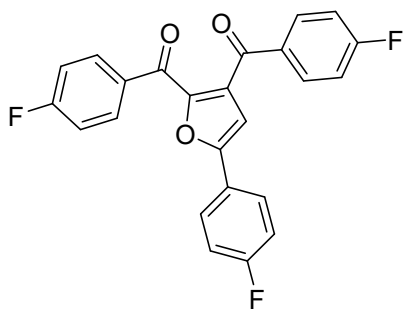

Yellow solid; m.p. 98-99 °C. (27.6 mg, 68% yield);  $^1\text{H}$  NMR (500 MHz,  $\text{CDCl}_3$ )  $\delta$  8.06-8.03 (m, 2H), 7.90-7.88 (m, 2H), 7.80-7.77 (m, 2H), 7.21-7.13 (m, 4H), 7.11-7.07 (m, 2H), 6.96 (s, 1H);  $^{13}\text{C}$  NMR (125 MHz,  $\text{CDCl}_3$ )  $\delta$  189.9, 180.3, 166.5 ( $J_{\text{F-C}} = 254.0$  Hz), 166.1 ( $J_{\text{F-C}} = 254.0$  Hz), 164.0 ( $J_{\text{F-C}} = 249.7$  Hz), 156.7, 149.1, 135.0, 133.7 ( $J_{\text{F-C}} = 2.5$  Hz), 133.2 ( $J_{\text{F-C}} = 2.3$  Hz), 132.7 ( $J_{\text{F-C}} = 9.3$  Hz), 132.3 ( $J_{\text{F-C}} = 9.5$  Hz), 127.5 ( $J_{\text{F-C}} = 8.5$  Hz), 125.3 ( $J_{\text{F-C}} = 3.5$  Hz), 116.9 ( $J_{\text{F-C}} = 22.1$  Hz), 116.3 ( $J_{\text{F-C}} = 22.0$  Hz), 116.2 ( $J_{\text{F-C}} = 21.7$  Hz), 108.2; HRMS (ESI) calculated for  $\text{C}_{24}\text{H}_{14}\text{F}_3\text{O}_3$  ( $\text{M}+\text{H}^+$ ): 407.0889, found: 407.0885.

(5-(4-chlorophenyl)furan-2,3-diyl)bis((4-chlorophenyl)methanone) (**2e**)

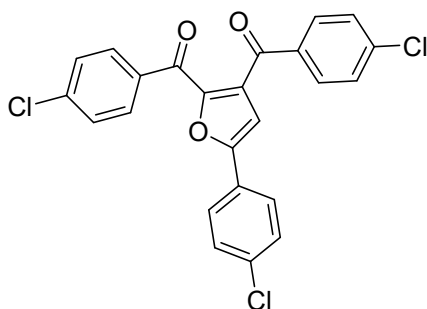

Yellow solid; m.p. 52-53 °C. (31.8 mg, 70% yield);  $^1\text{H}$  NMR (400 MHz,  $\text{CDCl}_3$ )  $\delta$  7.95 (d,  $J = 8.5$  Hz, 2H), 7.80 (d,  $J = 8.5$  Hz, 2H), 7.72 (d,  $J = 8.5$  Hz, 2H), 7.48-7.45 (m, 4H), 7.40 (d,  $J = 8.5$  Hz, 2H), 7.01 (s, 1H);  $^{13}\text{C}$  NMR (100 MHz,  $\text{CDCl}_3$ )  $\delta$  189.7, 180.1, 156.2, 148.8, 140.3, 139.8, 136.0, 135.2, 134.7, 134.5, 131.0, 130.6, 129.6, 129.0, 128.9, 127.0, 126.3, 108.5; HRMS (ESI) calculated for  $\text{C}_{24}\text{H}_{14}\text{Cl}_3\text{O}_3$  ( $\text{M}+\text{H}^+$ ): 455.0003, found: 454.9998.

(5-([1,1'-biphenyl]-4-yl)furan-2,3-diyl)bis([1,1'-biphenyl]-4-ylmethanone) (**2f**)

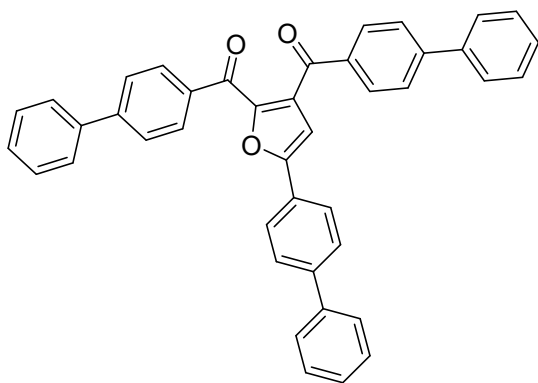

Yellow solid; m.p. 92-93 °C. (43.5 mg, 75% yield); <sup>1</sup>H NMR (500 MHz, CDCl<sub>3</sub>) δ 8.11 (d, *J* = 8.4 Hz, 2H), 7.96-7.91 (m, 4H), 7.74 (d, *J* = 8.4 Hz, 2H), 7.69 (d, *J* = 8.4 Hz, 2H), 7.66-7.63 (m, 5H), 7.62-7.59 (m, 3H), 7.50-7.44 (m, 7H), 7.42-7.39 (m, 2H), 7.11 (s, 1H); <sup>13</sup>C NMR (125 MHz, CDCl<sub>3</sub>) δ 191.3, 181.6, 157.3, 149.6, 146.6, 146.1, 142.9, 140.4, 140.2, 136.1, 135.8, 135.2, 130.7, 130.3, 129.4, 129.3, 128.7, 128.3, 128.2, 128.0, 127.7, 127.6, 127.5, 127.4, 126.0, 108.7; HRMS (ESI) calculated for C<sub>42</sub>H<sub>29</sub>O<sub>3</sub> (M+H<sup>+</sup>): 581.2111, found: 581.2106.

(5-(*o*-tolyl)furan-2,3-diyl)bis(*o*-tolylmethanone) (**2g**)

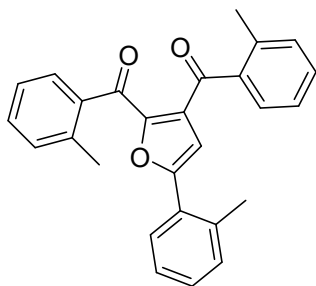

Yellow solid; m.p. 55-56 °C. (26.4 mg, 67% yield); <sup>1</sup>H NMR (400 MHz, CDCl<sub>3</sub>) δ 7.81-7.79 (m, 1H), 7.43 (d, *J* = 7.2 Hz, 1H), 7.37 (d, *J* = 7.5 Hz, 1H), 7.32-7.24 (m, 5H), 7.13 (t, *J* = 7.0 Hz, 3H), 7.05 (d, *J* = 7.6 Hz, 1H), 6.97 (s, 1H), 2.56 (s, 3H), 2.40 (s, 3H), 2.19 (s, 3H); <sup>13</sup>C NMR (100 MHz, CDCl<sub>3</sub>) δ 192.5, 184.9, 156.8, 149.2, 139.8, 137.9, 137.3, 137.1, 135.9, 134.8, 132.0, 131.9, 131.6, 131.2, 131.1, 131.06, 129.5, 129.2, 128.1, 128.05, 126.4, 125.3, 125.27, 111.5, 22.0, 21.4, 19.9; HRMS (ESI) calculated for C<sub>27</sub>H<sub>23</sub>O<sub>3</sub> (M+H<sup>+</sup>): 395.1641, found: 395.1638.

(5-(2-methoxyphenyl)furan-2,3-diyl)bis((2-methoxyphenyl)methanone) (**2h**)

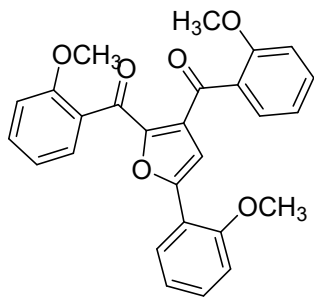

Yellow solid; m.p. 77-78 °C. (27.4 mg, 62% yield);  $^1\text{H}$  NMR (500 MHz,  $\text{CDCl}_3$ )  $\delta$  7.94-7.92 (m, 1H), 7.45-7.43 (m, 1H), 7.38-7.33 (m, 3H), 7.32 (s, 1H), 7.28-7.26 (m, 1H), 7.05-6.99 (m, 2H), 6.85-6.82 (m, 2H), 6.78-6.74 (m, 2H), 3.96 (s, 3H), 3.68 (s, 3H), 3.66 (s, 3H);  $^{13}\text{C}$  NMR (125 MHz,  $\text{CDCl}_3$ )  $\delta$  190.5, 183.0, 158.9, 158.1, 157.0, 153.0, 148.7, 135.7, 133.9, 133.0, 131.6, 130.6, 130.5, 128.43, 128.4, 127.4, 121.6, 120.7, 120.6, 118.4, 113.3, 111.8, 111.5, 111.4, 55.9, 55.8; HRMS (ESI) calculated for  $\text{C}_{27}\text{H}_{23}\text{O}_6$  ( $\text{M}+\text{H}^+$ ): 443.1989, found: 443.1986.

(5-(*m*-tolyl)furan-2,3-diyl)bis(*m*-tolylmethanone) (**2i**)

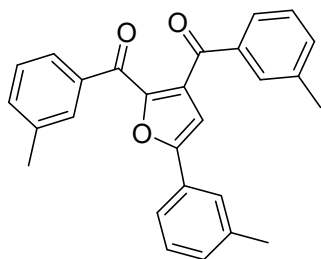

Yellow solid; m.p. 76-77 °C. (28.4 mg, 72% yield);  $^1\text{H}$  NMR (400 MHz,  $\text{CDCl}_3$ )  $\delta$  7.74-7.71 (m, 1H), 7.66-7.55 (m, 5H), 7.39-7.23 (m, 7H), 2.43 (s, 3H), 2.33 (s, 6H);  $^{13}\text{C}$  NMR (100 MHz,  $\text{CDCl}_3$ )  $\delta$  191.5, 182.2, 157.1, 149.0, 138.8, 138.2, 138.1, 137.2, 137.0, 134.6, 134.2, 133.5, 130.5, 130.0, 129.5, 129.0, 128.7, 128.3, 128.2, 126.7, 126.6, 125.7, 122.3, 107.9, 21.5, 21.3; HRMS (ESI) calculated for  $\text{C}_{27}\text{H}_{23}\text{O}_3$  ( $\text{M}+\text{H}^+$ ): 395.1641, found: 395.1637.

(5-(3-methoxyphenyl)furan-2,3-diyl)bis((3-methoxyphenyl)methanone) (**2j**)

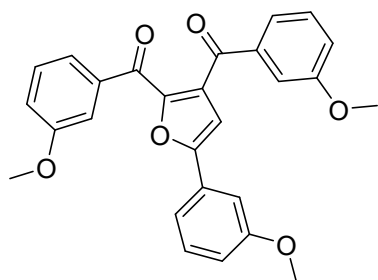

Yellow solid; m.p. 95-96 °C. (30.5 mg, 69% yield);  $^1\text{H}$  NMR (500 MHz,  $\text{CDCl}_3$ )  $\delta$  7.59-7.57 (m, 1H), 7.40-7.39 (m, 3H), 7.37-7.36 (m, 1H), 7.35-7.32 (m, 3H), 7.29-7.25 (m, 1H), 7.10-7.06 (m, 2H), 7.02 (s, 1H), 6.98-6.96 (m, 1H), 3.88 (s, 3H), 3.81 (s, 3H), 3.80 (s, 3H);  $^{13}\text{C}$  NMR (125 MHz,  $\text{CDCl}_3$ )  $\delta$  191.4, 182.0, 160.4, 160.1, 159.9, 157.2, 149.4, 138.8, 138.4, 135.0, 130.6, 130.3, 129.9, 129.8, 122.8, 122.7, 120.8, 120.4, 118.1, 115.9, 113.7, 113.0, 110.8, 108.7, 55.8, 55.75; HRMS (ESI) calculated for  $\text{C}_{27}\text{H}_{23}\text{O}_6$  ( $\text{M}+\text{H}^+$ ): 443.1489, found: 443.1486.

(5-(3-fluorophenyl)furan-2,3-diyl)bis((3-fluorophenyl)methanone) (**2k**)

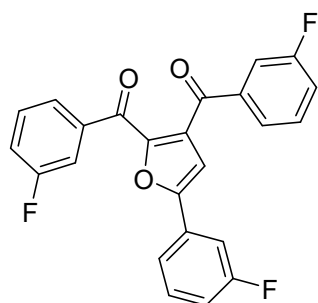

Yellow solid; m.p. 58-59 °C. (26.4 mg, 65% yield);  $^1\text{H}$  NMR (300 MHz,  $\text{CDCl}_3$ )  $\delta$  7.83 (d,  $J = 7.6$  Hz, 1H), 7.70-7.37 (m, 8H), 7.33-7.27 (m, 2H), 7.18-7.13 (m, 1H), 7.05 (s, 1H);  $^{13}\text{C}$  NMR (75 MHz,  $\text{CDCl}_3$ )  $\delta$  189.5, 180.0, 163.1 ( $J_{\text{F-C}} = 245.9$  Hz), 162.8 ( $J_{\text{F-C}} = 247.0$  Hz), 162.6 ( $J_{\text{F-C}} = 246.7$  Hz), 156.1 ( $J_{\text{F-C}} = 1.5$  Hz), 148.9, 138.8 ( $J_{\text{F-C}} = 6.4$  Hz), 138.2 ( $J_{\text{F-C}} = 6.6$  Hz), 134.5, 131.0 ( $J_{\text{F-C}} = 8.3$  Hz), 130.3 ( $J_{\text{F-C}} = 14.1$  Hz), 130.34, 125.4 ( $J_{\text{F-C}} = 3.0$  Hz), 125.1 ( $J_{\text{F-C}} = 3.0$  Hz), 120.9, 120.89, 120.7, 120.5, 120.2, 117.0 ( $J_{\text{F-C}} = 21.2$  Hz), 116.4 ( $J_{\text{F-C}} = 22.9$  Hz), 115.7 ( $J_{\text{F-C}} = 22.6$  Hz), 112.1 ( $J_{\text{F-C}} = 23.7$  Hz), 108.9; HRMS (ESI) calculated for  $\text{C}_{24}\text{H}_{14}\text{F}_3\text{O}_3$  ( $\text{M}+\text{H}^+$ ): 407.0889, found: 407.0886.

(5-(3-chlorophenyl)furan-2,3-diyl)bis((3-chlorophenyl)methanone) (**2l**)

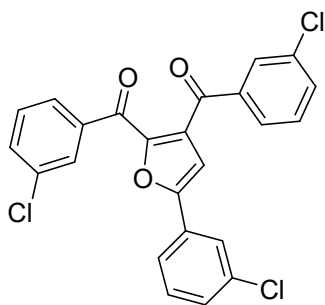

Yellow solid; m.p. 59-60 °C. (35.4 mg, 78% yield);  $^1\text{H}$  NMR (400 MHz,  $\text{CDCl}_3$ )  $\delta$  7.92-7.91 (m, 1H), 7.86-7.84 (m, 1H), 7.79-7.76 (m, 2H), 7.70-7.68 (m, 2H), 7.57-7.54 (m, 2H), 7.47-7.40 (m, 3H), 7.38-7.34 (m, 1H), 7.06 (s, 1H);  $^{13}\text{C}$  NMR (100 MHz,  $\text{CDCl}_3$ )  $\delta$  189.4, 180.1, 156.0, 148.9, 138.4, 137.9, 135.4, 135.1, 134.9, 134.4, 133.6, 133.1, 130.6, 130.1, 130.02, 130.0, 129.9, 129.6, 129.0, 127.6, 127.3, 125.2, 123.2, 108.9; HRMS (ESI) calculated for  $\text{C}_{24}\text{H}_{14}\text{Cl}_3\text{O}_3$  ( $\text{M}+\text{H}^+$ ): 455.0003, found: 455.0002.

(5-(3-bromophenyl)furan-2,3-diyl)bis((3-bromophenyl)methanone) (**2m**)

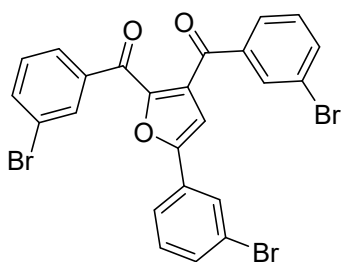

Yellow solid; m.p. 102-103 °C. (46.9 mg, 80% yield);  $^1\text{H}$  NMR (400 MHz,  $\text{CDCl}_3$ )  $\delta$  8.06-8.05 (m, 1H), 7.96-7.95 (m, 1H), 7.91-7.90 (m, 1H), 7.86 (d,  $J = 7.8$  Hz, 1H), 7.75 – 7.68 (m, 4H), 7.58 (d,  $J = 8.0$  Hz, 1H), 7.40- 7.29 (m, 3H), 7.06 (s, 1H);  $^{13}\text{C}$  NMR (100 MHz,  $\text{CDCl}_3$ )  $\delta$  189.4, 180.1, 155.9, 148.9, 138.6, 138.1, 136.5, 136.0, 134.3, 133.0, 132.5, 131.9, 130.8, 130.3, 130.2, 130.17, 128.1, 128.0, 127.7, 123.7, 123.4, 123.1, 122.9, 108.9; HRMS (ESI) calculated for  $\text{C}_{24}\text{H}_{14}\text{Br}_3\text{O}_3$  ( $\text{M}+\text{H}^+$ ): 586.8487, found: 586.8482.

(5-([1,1'-biphenyl]-3-yl)furan-2,3-diyl)bis([1,1'-biphenyl]-3-ylmethanone) (**2n**)

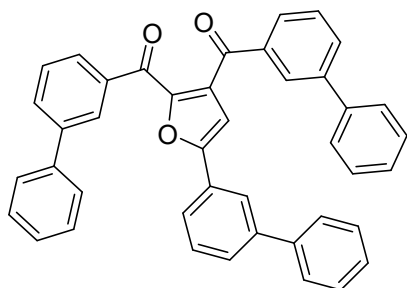

Yellow solid; m.p. 82-83 °C. (41.2 mg, 71% yield);  $^1\text{H}$  NMR (400 MHz,  $\text{CDCl}_3$ )  $\delta$  8.15-8.14 (m, 1H), 8.07-8.06 (m, 1H), 8.01-8.00 (m, 1H), 7.90-7.87 (m, 1H), 7.84-7.82 (m, 1H), 7.78-7.70 (m, 3H), 7.67-7.60 (m, 3H), 7.58-7.33 (m, 16H), 7.16 (s, 1H);  $^{13}\text{C}$  NMR (100 MHz,  $\text{CDCl}_3$ )  $\delta$  191.1, 182.0, 157.2, 149.2, 142.3, 141.6, 141.4, 140.3, 139.9, 137.7, 137.5, 134.6, 132.2, 131.6, 129.6, 129.2, 129.1, 129.0, 128.9, 128.7, 128.3, 127.8, 127.2, 127.0, 124.1, 123.9, 108.5; HRMS (ESI) calculated for  $\text{C}_{42}\text{H}_{29}\text{O}_3$  ( $\text{M}+\text{H}^+$ ): 581.2111, found: 581.2108.

(5-(3-(trifluoromethyl)phenyl)furan-2,3-diyl)bis((3-(trifluoromethyl)phenyl)methanone) (**2o**)

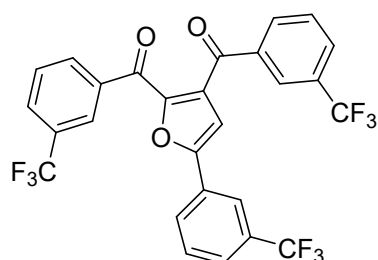

White solid; m.p. 78-79 °C. (40.0 mg, 72% yield);  $^1\text{H}$  NMR (500 MHz,  $\text{CDCl}_3$ )  $\delta$  8.35 (s, 1H), 8.14 (d,  $J = 7.9$  Hz, 1H), 8.10 (s, 1H), 8.07 (s, 1H), 8.03 (d,  $J = 7.9$  Hz, 1H), 7.99 (d,  $J = 7.8$  Hz, 1H), 7.87-7.82 (m, 2H), 7.72 (d,  $J = 7.8$  Hz, 1H), 7.67-7.62 (m, 2H), 7.58 (t,  $J = 7.8$  Hz, 1H), 7.17 (s, 1H);  $^{13}\text{C}$  NMR (125 MHz,  $\text{CDCl}_3$ )  $\delta$  189.2, 179.9, 156.1, 148.9, 137.3, 136.7, 134.4, 132.7, 132.4, 132.3, 132.2, 131.9, 131.8, 131.6, 131.58, 131.4, 131.3, 131.1, 131.06, 130.9, 130.2 ( $J_{\text{F-C}} = 3.2$  Hz), 130.0, 129.8 ( $J_{\text{F-C}} = 3.1$  Hz), 129.44, 129.4, 129.1, 128.2, 126.9, 126.8, 126.7, 126.63, 126.6, 125.9 ( $J_{\text{F-C}} = 3.6$  Hz), 124.7, 124.6, 124.58, 122.5, 122.47, 122.4, 122.0 ( $J_{\text{F-C}} = 4.0$  Hz), 120.4, 120.3, 120.2. (The  $^{13}\text{C}$  NMR spectrum was very complex due to C-F coupling. All signals observed were shown);  $^{19}\text{F}$  NMR (376 Mz,  $\text{CDCl}_3$ ):  $\delta$  -62.9, -63.0, -63.1; HRMS (ESI) calculated for  $\text{C}_{27}\text{H}_{14}\text{F}_9\text{O}_3$  ( $\text{M}+\text{H}^+$ ): 557.0793, found: 557.0790.

(5-(3,5-dimethylphenyl)furan-2,3-diyl)bis((3,5-dimethylphenyl)methanone) (**2p**)

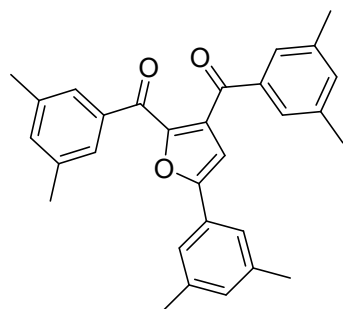

White solid; m.p. 64-65 °C. (25.3 mg, 58% yield);  $^1\text{H}$  NMR (400 MHz,  $\text{CDCl}_3$ )  $\delta$  7.47 (s, 2H), 7.41 (s, 2H), 7.30 (s, 2H), 7.13 (s, 2H), 7.06 (s, 1H), 7.98 (s, 1H), 2.39 (s, 6H), 2.28-2.27 (m, 12H);  $^{13}\text{C}$  NMR (100 MHz,  $\text{CDCl}_3$ )  $\delta$  191.8, 182.7, 157.3, 149.0, 138.7, 138.1, 138.0, 137.5, 137.4, 135.0, 134.7, 134.2, 131.5, 128.7, 127.2, 127.0, 123.0, 107.8, 21.4, 21.1; HRMS (ESI) calculated for  $\text{C}_{30}\text{H}_{29}\text{O}_3$  ( $\text{M}+\text{H}^+$ ): 437.2111, found: 437.2107.

(5-mesitylfuran-2,3-diyl)bis(mesitylmethanone) (**2q**)

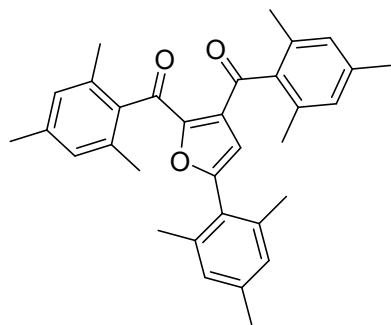

Yellow oil; (25.3 mg, 53% yield);  $^1\text{H}$  NMR (400 MHz,  $\text{CDCl}_3$ )  $\delta$  6.88 (s, 2H), 6.84 (s, 2H), 6.76 (s, 2H), 6.67 (s, 1H), 2.28-2.26 (12H), 2.24 (s, 3H), 2.12 (s, 6H), 2.06 (s, 6H);  $^{13}\text{C}$  NMR (100 MHz,  $\text{CDCl}_3$ )  $\delta$  195.5, 188.3, 155.4, 150.6, 139.8, 139.3, 139.0, 138.1, 137.5, 136.1, 135.2, 134.5, 133.4, 129.1, 128.6, 128.3, 125.8, 113.6, 21.2, 20.6, 20.1, 19.2; HRMS (ESI) calculated for  $\text{C}_{33}\text{H}_{35}\text{O}_3$  ( $\text{M}+\text{H}^+$ ): 479.2580, found: 479.2574.

(5-(naphthalen-1-yl)furan-2,3-diyl)bis(naphthalen-1-ylmethanone) (**2r**)

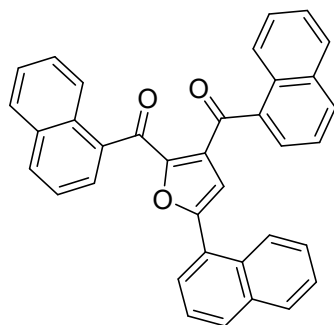

Yellow solid; m.p. 75-76 °C. (32.1 mg, 64% yield);  $^1\text{H}$  NMR (500 MHz,  $\text{CDCl}_3$ )  $\delta$  8.54 (d,  $J = 8.4$  Hz, 1H), 8.44-8.46 (m, 1H), 8.01-7.99 (m, 2H), 7.97-7.93 (m, 2H), 7.67-7.63 (m, 2H), 7.61-7.53 (m, 4H), 7.48-7.43 (m, 4H), 7.37-7.36 (m, 2H), 7.35 (s, 2H), 7.14-7.07 (m, 2H);  $^{13}\text{C}$  NMR (125 MHz,  $\text{CDCl}_3$ )  $\delta$  192.3, 184.6, 157.5, 151.2, 135.8, 135.7, 135.5, 134.4, 133.7, 133.6, 133.5, 132.5, 131.2, 131.1, 130.5, 130.2, 130.1, 129.3, 129.1, 128.5, 128.1, 127.9, 126.8, 126.7, 126.4, 125.7, 125.4, 124.5, 124.2, 113.1; HRMS (ESI) calculated for  $\text{C}_{36}\text{H}_{23}\text{O}_3$  ( $\text{M}+\text{H}^+$ ): 503.1641, found: 503.1637.

[2,2'-bifuran]-4,5-diylbis(furan-2-ylmethanone) (**2s**)

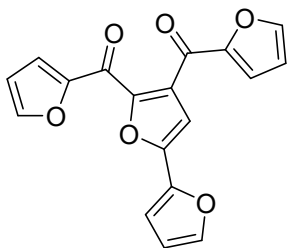

Yellow solid; m.p. 72-73 °C. (13.8 mg, 43% yield); <sup>1</sup>H NMR (400 MHz, CDCl<sub>3</sub>) δ 7.67 (s, 1H), 7.62-7.57 (m, 3H), 7.19 (d, *J* = 3.3 Hz, 1H), 6.94 (s, 1H), 6.90 (d, *J* = 3.2 Hz, 1H), 6.62-6.53 (m, 3H); <sup>13</sup>C NMR (100 MHz, CDCl<sub>3</sub>) δ 190.2, 185.1, 177.3, 168.1, 152.5, 150.8, 148.6, 147.7, 147.6, 147.5, 144.5, 144.1, 132.4, 120.7, 119.9, 112.7, 109.4, 107.8; HRMS (ESI) calculated for C<sub>18</sub>H<sub>11</sub>O<sub>6</sub> (M+H<sup>+</sup>): 323.0550, found: 323.0547.

(5-(thiophen-2-yl)furan-2,3-diyl)bis(thiophen-2-ylmethanone) (**2t**)

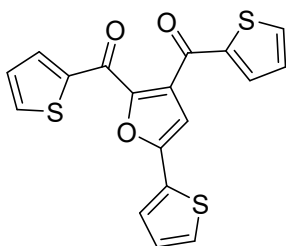

Yellow solid; m.p. 65-66 °C. (16.7 mg, 45% yield); <sup>1</sup>H NMR (400 MHz, CDCl<sub>3</sub>) δ 8.25-8.24 (m, 1H), 7.75-7.71 (m, 2H), 7.60-7.59 (m, 1H), 7.55-7.54 (m, 1H), 7.46-7.45 (m, 1H), 7.24-7.22 (m, 1H), 7.17-7.15 (m, 1H), 7.11-7.09 (m, 1H), 6.86 (s, 1H); <sup>13</sup>C NMR (100 MHz, CDCl<sub>3</sub>) δ 182.6, 172.0, 152.3, 147.2, 143.7, 141.7, 135.3, 134.9, 134.8, 134.4, 134.2, 131.3, 128.4, 128.3, 127.6, 126.2, 107.7; HRMS (ESI) calculated for C<sub>18</sub>H<sub>11</sub>O<sub>3</sub>S<sub>3</sub> (M+H<sup>+</sup>): 370.9864, found: 370.9861.

(5-(3-(naphthalen-1-yl)phenyl)furan-2,3-diyl)bis((3-(naphthalen-1-yl)phenyl)methanone) (**3**)

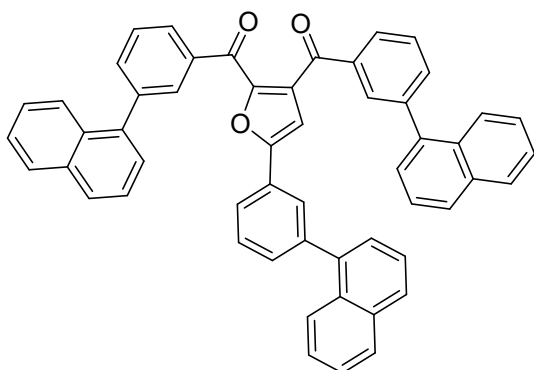

White solid; m.p. 92-93. (62mg, 85% yield);  $^1\text{H}$  NMR (400 MHz,  $\text{CDCl}_3$ )  $\delta$  8.14-8.13 (m, 1H), 8.06-8.05 (m, 1H), 8.01-8.00 (m, 1H), 7.95-7.92 (m, 2H), 7.90-7.89 (m, 2H), 7.87-7.80 (m, 6H), 7.78-7.75 (m, 1H), 7.69-7.65 (m, 3H), 7.58-7.51 (m, 6H), 7.67-7.41 (m, 4H), 7.38-7.28 (m, 5H), 7.15-7.11 (m, 1H), 7.08 (s, 1H);  $^{13}\text{C}$  NMR (100 MHz,  $\text{CDCl}_3$ )  $\delta$  191.1, 181.9, 157.2, 149.2, 141.7, 141.1, 141.05, 139.2, 138.9, 138.8, 137.1, 137.0, 135.2, 134.7, 134.5, 133.8, 133.7, 133.67, 131.5, 131.4, 131.3, 131.29, 131.2, 131.1, 129.1, 128.8, 128.78, 128.6, 128.4, 128.36, 128.3, 128.2, 128.1, 128.05, 127.7, 127.1, 127.0, 126.98, 126.6, 126.4, 126.3, 126.32, 126.0, 125.9, 125.9, 125.7, 125.6, 125.5, 125.4, 125.3, 124.1, 121.6, 120.5, 108.6; HRMS (ESI) calculated for  $\text{C}_{54}\text{H}_{35}\text{O}_3$  ( $\text{M}+\text{H}^+$ ): 731.2580, found: 731.2576.

(5-(3-(9H-carbazol-9-yl)phenyl)furan-2,3-diyl)bis((3-(9H-carbazol-9-yl)phenyl)methanone)  
(4)

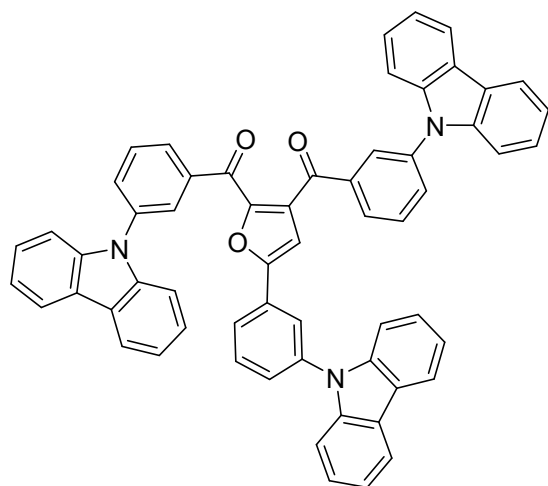

Yellow solid; m.p. 108-109 °C. (101.6mg, 60% yield);  $^1\text{H}$  NMR (400 MHz,  $\text{CDCl}_3$ )  $\delta$  8.34 (s, 1H), 8.20-8.17 (m, 1H), 8.15 (s, 1H), 8.13-8.09 (m, 4H), 8.06-8.02 (m, 3H), 7.92 (s, 1H), 7.83-7.80 (m, 1H), 7.76-7.68 (m, 4H), 7.58-7.56 (m, 2H), 7.39-7.38 (m, 6H), 7.31-7.24 (m, 8H), 7.22 (s, 1H), 7.16-7.13 (m, 3H), 7.07 (s, 1H);  $^{13}\text{C}$  NMR (100 MHz,  $\text{CDCl}_3$ )  $\delta$  190.0, 180.4, 156.7, 149.2, 140.6, 140.57, 138.8, 138.4, 138.3, 138.2, 138.0, 134.8, 132.3, 132.0, 131.0, 130.4, 130.3, 128.7, 128.5, 128.2, 127.7, 126.21, 126.2, 126.1, 124.0, 123.7, 123.6, 123.61, 123.58, 123.5, 120.52, 120.5, 120.4, 120.3, 109.6, 109.56, 109.5, 109.4; HRMS (ESI) calculated for  $\text{C}_{60}\text{H}_{34}\text{N}_3\text{O}_3$  ( $\text{M}+\text{H}^+$ ): 844.2594, found: 844.2591.

3-(3,5-di-tert-butyl-4-hydroxyphenyl)-2-(methylsulfonyl)-1-phenylpropan-1-one (C)

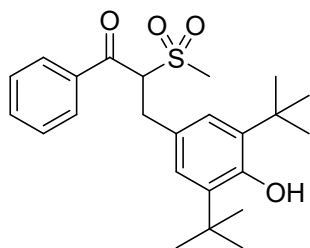

White solid; m.p. 83-84 °C. (74.8 mg, 90% yield);  $^1\text{H}$  NMR (400 MHz,  $\text{CDCl}_3$ )  $\delta$  7.69 (d,  $J$  = 8.0 Hz, 2H), 7.51 (t,  $J$  = 7.3 Hz, 1H), 7.35 (t,  $J$  = 7.6 Hz, 2H), 6.85 (s, 2H), 5.07-5.06 (m, 0.5H), 5.04 (s, 1H), 3.53-3.41 (m, 2H), 3.10 (s, 3H), 1.26 (s, 18H);  $^{13}\text{C}$  NMR (100 MHz,  $\text{CDCl}_3$ )  $\delta$  194.8, 152.9, 137.0, 136.4, 134.0, 128.7, 128.6, 128.5, 125.6, 125.3, 70.6, 37.9, 35.6, 34.3, 30.0. HRMS (ESI) calculated for  $\text{C}_{24}\text{H}_{33}\text{O}_4\text{S}$  ( $\text{M}+\text{H}^+$ ): 471.2094, found: 471.2090.

(5-(p-tolyl)furan-2,3-diyl)bis(phenylmethanone) (**5**)

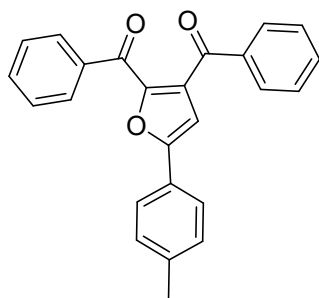

White solid; (64.4 mg, 88% yield)  $^1\text{H}$  NMR (400 MHz,  $\text{CDCl}_3$ )  $\delta$  7.98 (d,  $J$  = 8.0 Hz, 1H), 7.92 (d,  $J$  = 8.0 Hz, 1H), 7.87-7.84 (m, 2H), 7.81 (d,  $J$  = 7.9 Hz, 1H), 7.70 (d,  $J$  = 8.0 Hz, 1H), 7.56-7.38 (m, 6H), 7.30-7.24 (m, 2H), 7.02 (s, 0.5H), 6.98 (s, 0.5H), 2.42 (s, 3H);  $^{13}\text{C}$  NMR (100 MHz,  $\text{CDCl}_3$ )  $\delta$  191.4, 181.6, 181.3, 157.4, 156.7, 148.7, 143.9, 140.1, 137.0, 136.8, 134.8, 134.0, 133.5, 132.9, 129.8, 129.6, 129.3, 129.2, 129.1, 128.5, 128.4, 125.1, 108.1, 107.6, 21.7, 21.5. HRMS (ESI) calculated for  $\text{C}_{25}\text{H}_{19}\text{O}_3$  ( $\text{M}+\text{H}^+$ ): 367.1328, found: 367.1323.

# Copies of $^1\text{H}$ and $^{13}\text{C}$ Spectra

## (5-phenylfuran-2,3-diyl)bis(phenylmethanone) (2a)

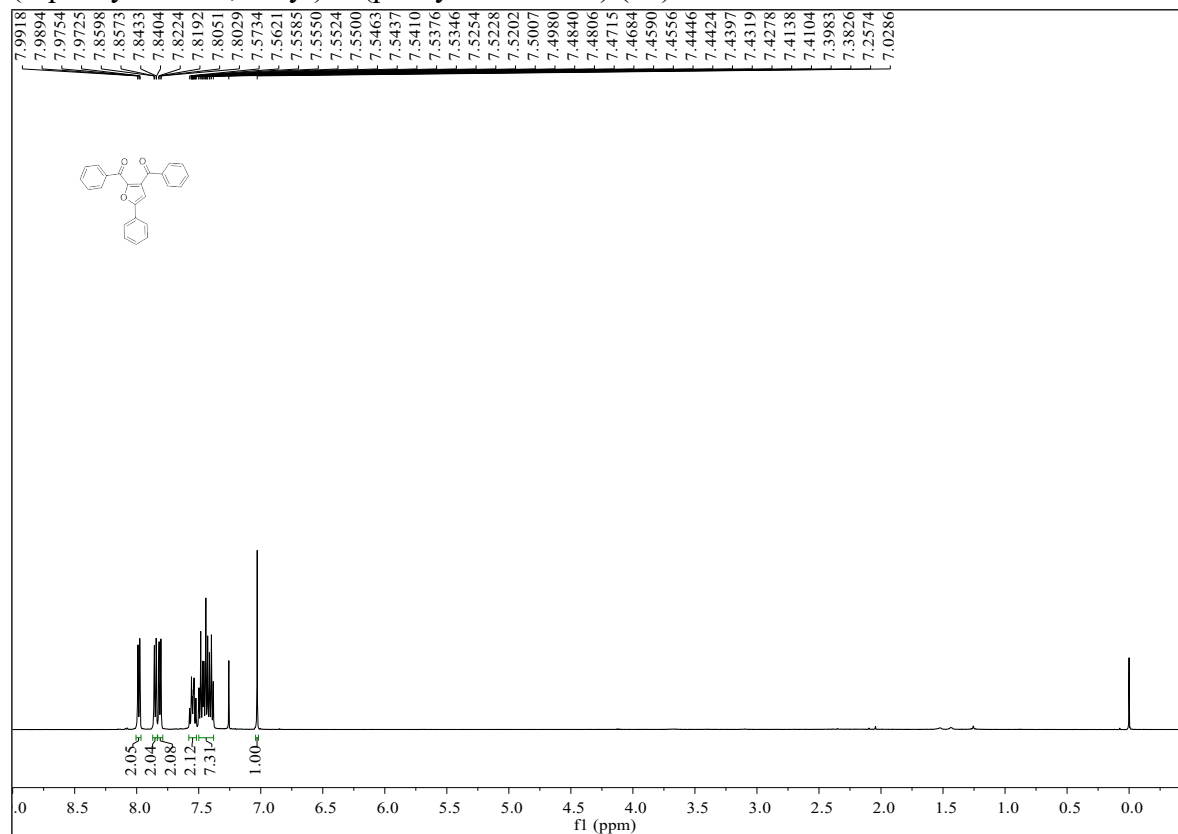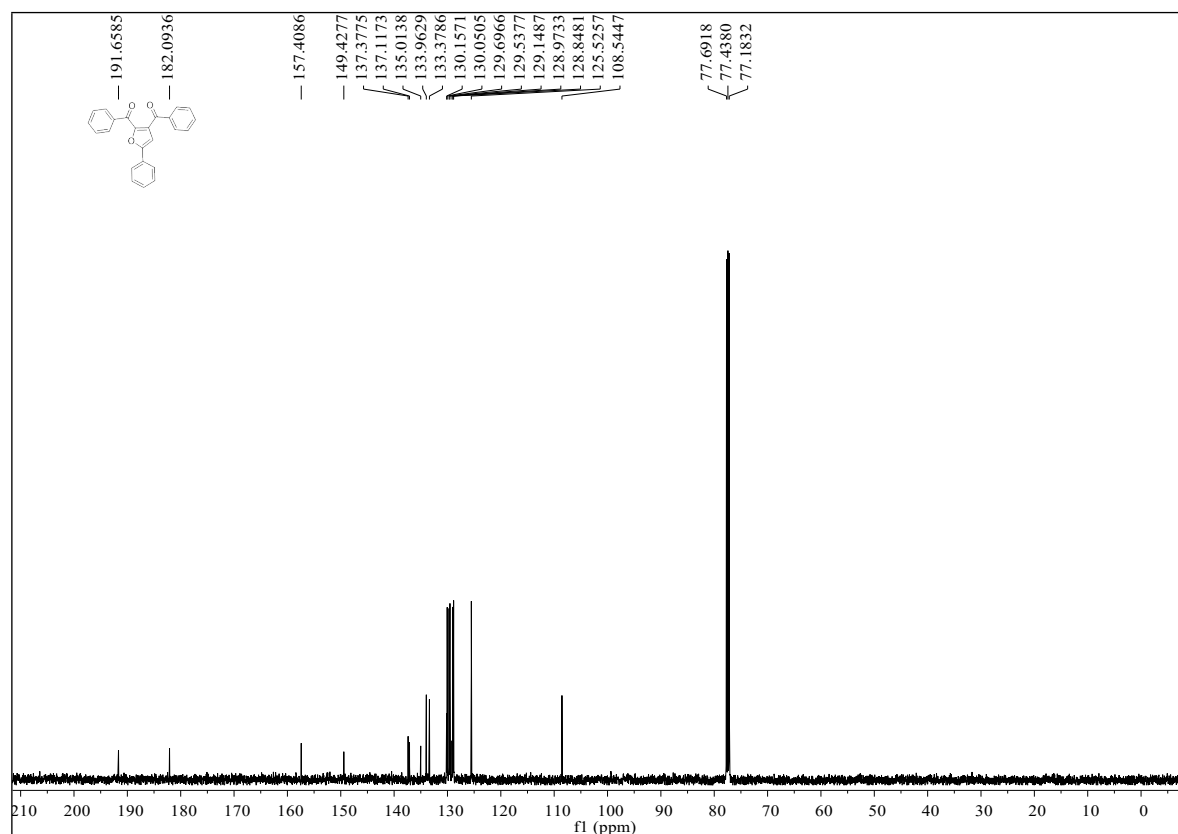

(5-(p-tolyl)furan-2,3-diyl)bis(p-tolylmethanone) (**2b**)

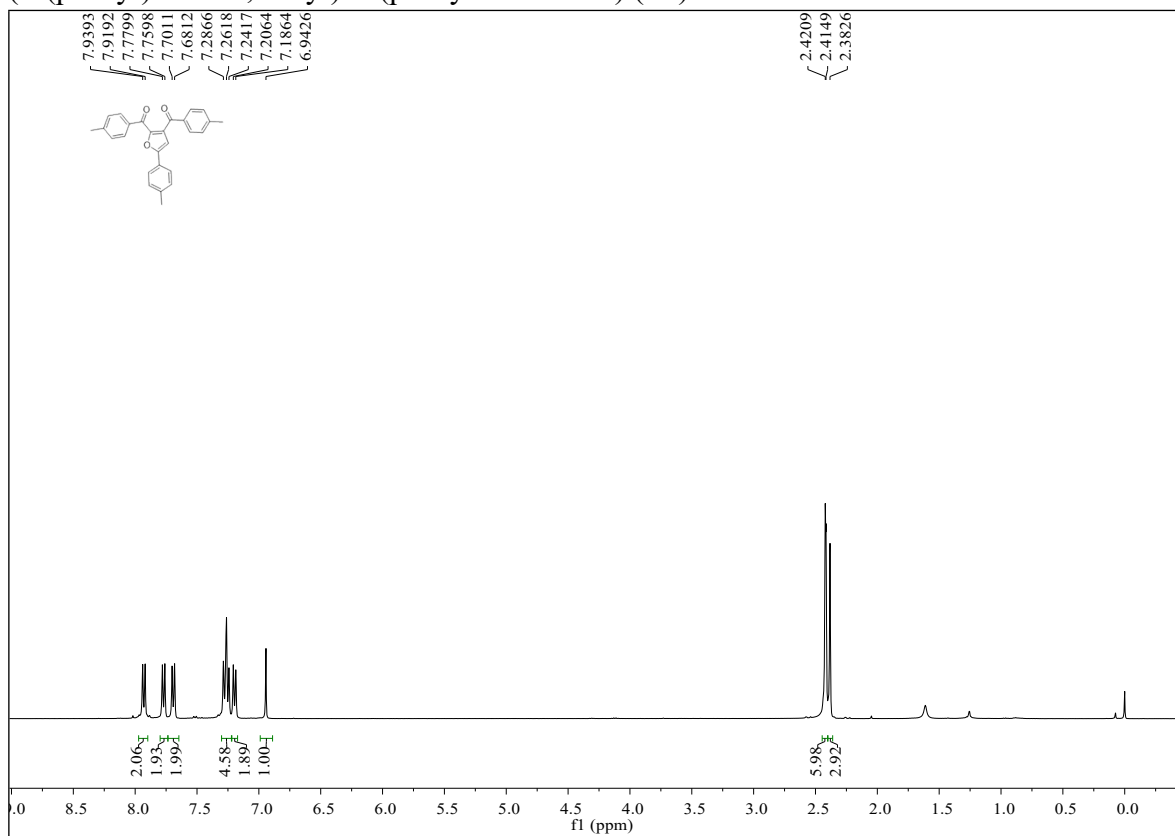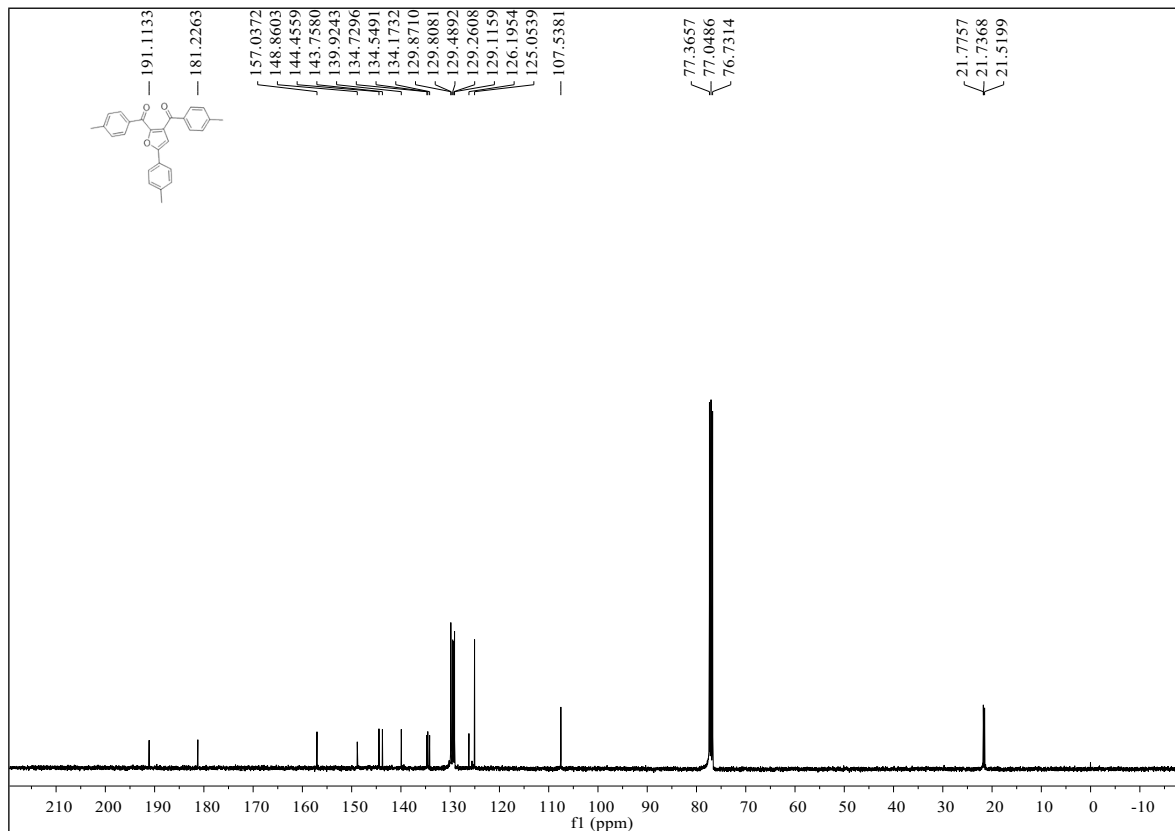

(5-(4-methoxyphenyl)furan-2,3-diyl)bis((4-methoxyphenyl)methanone) (**2c**)

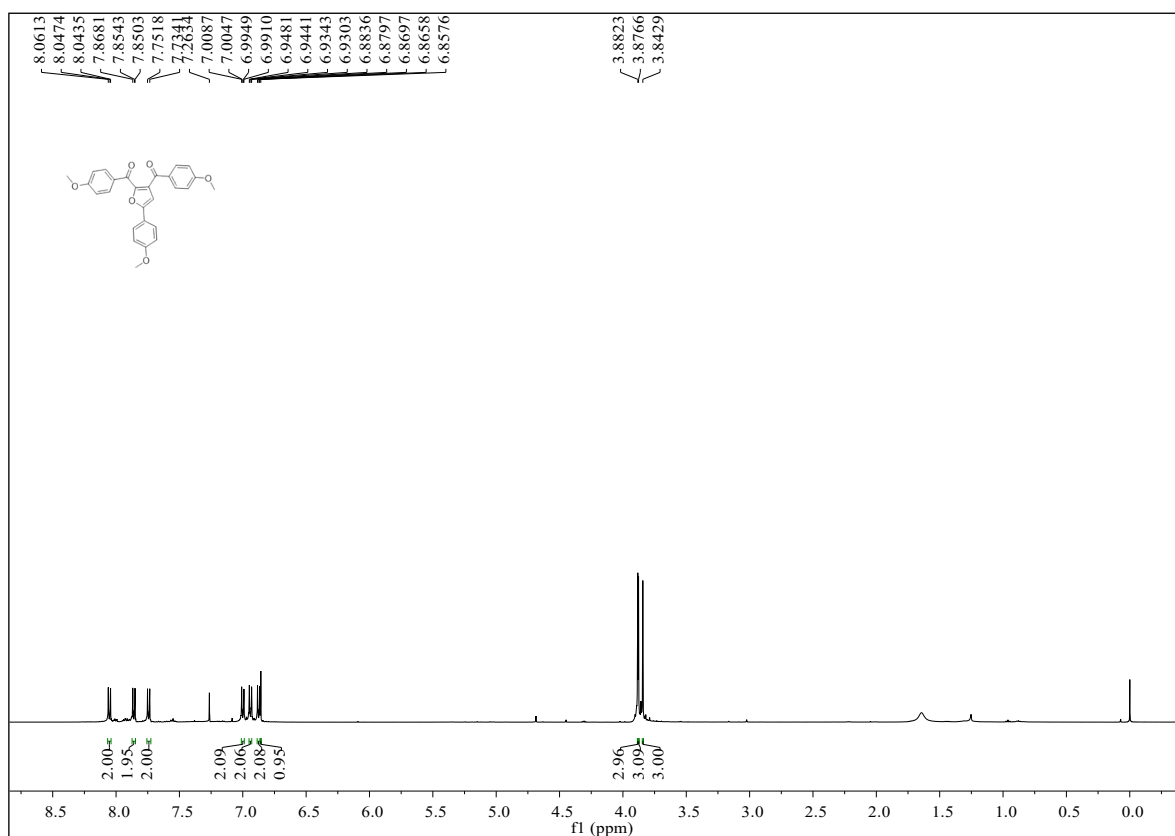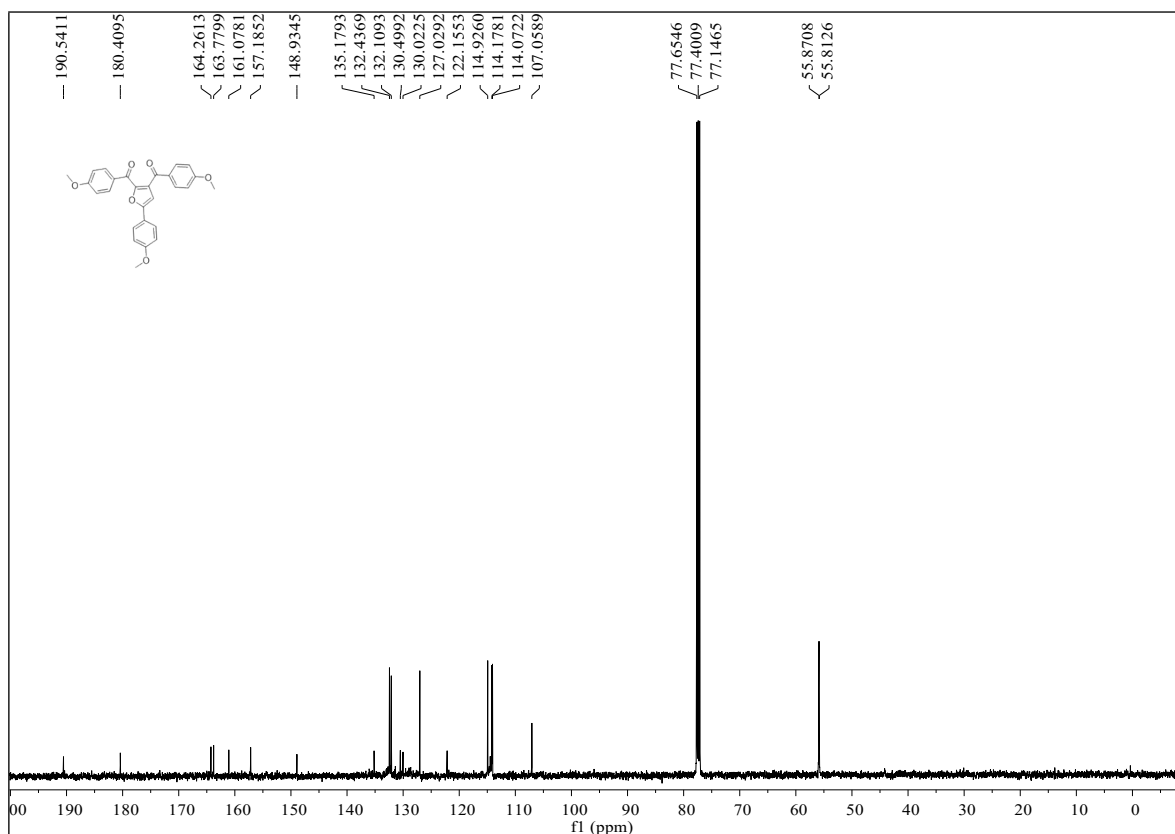

(5-(4-fluorophenyl)furan-2,3-diyl)bis((4-fluorophenyl)methanone) (**2d**)

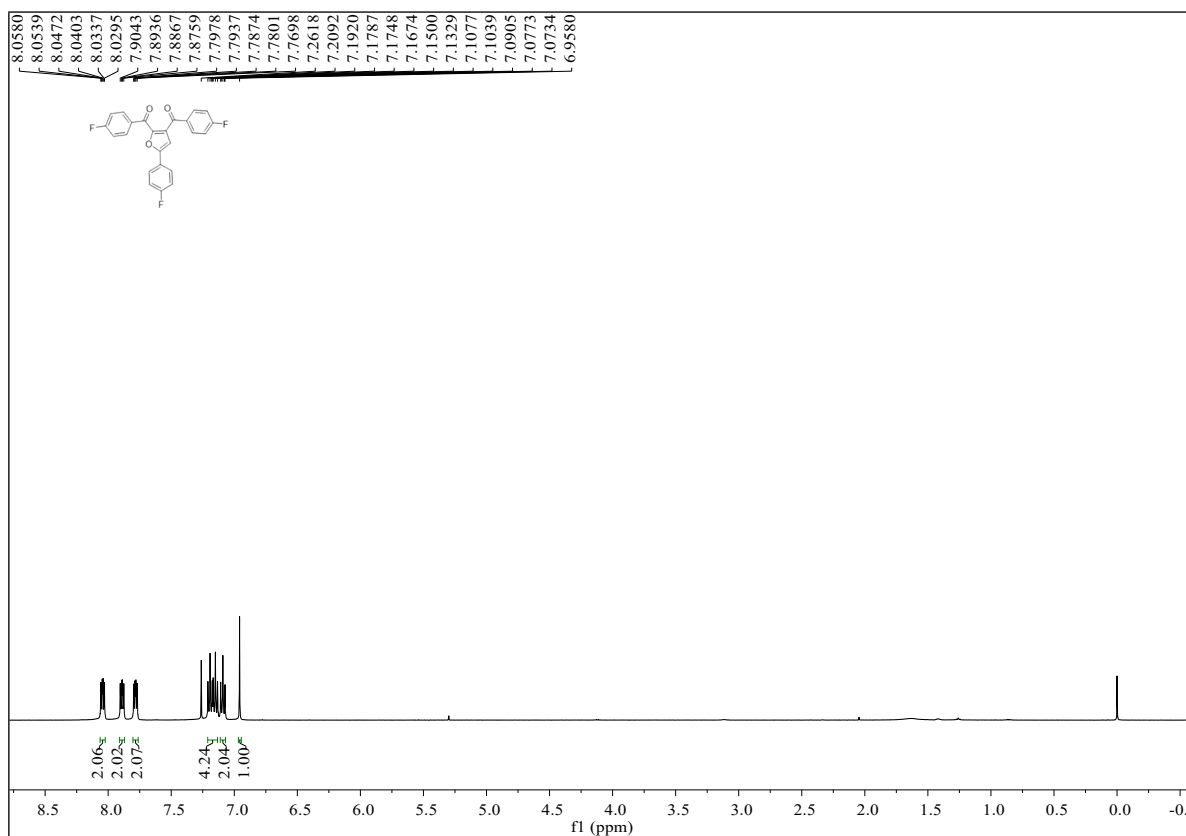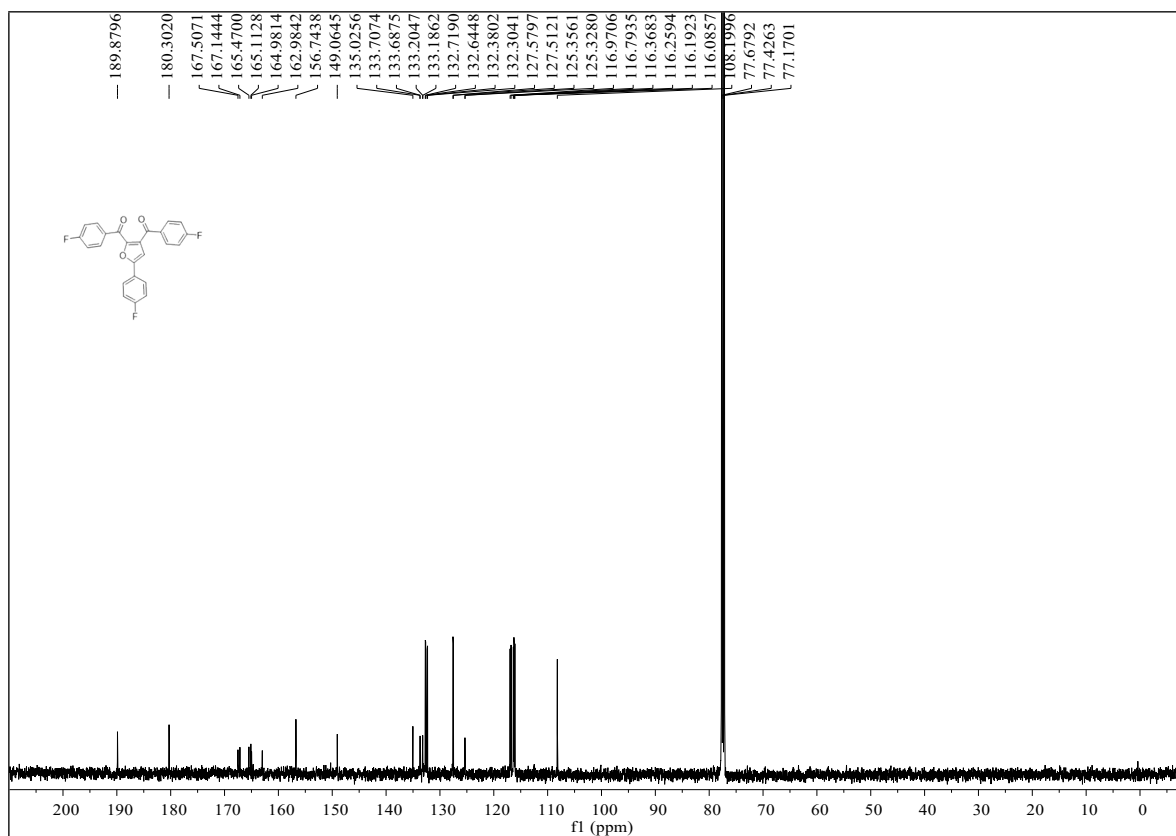

(5-(4-chlorophenyl)furan-2,3-diyl)bis((4-chlorophenyl)methanone) (**2e**)

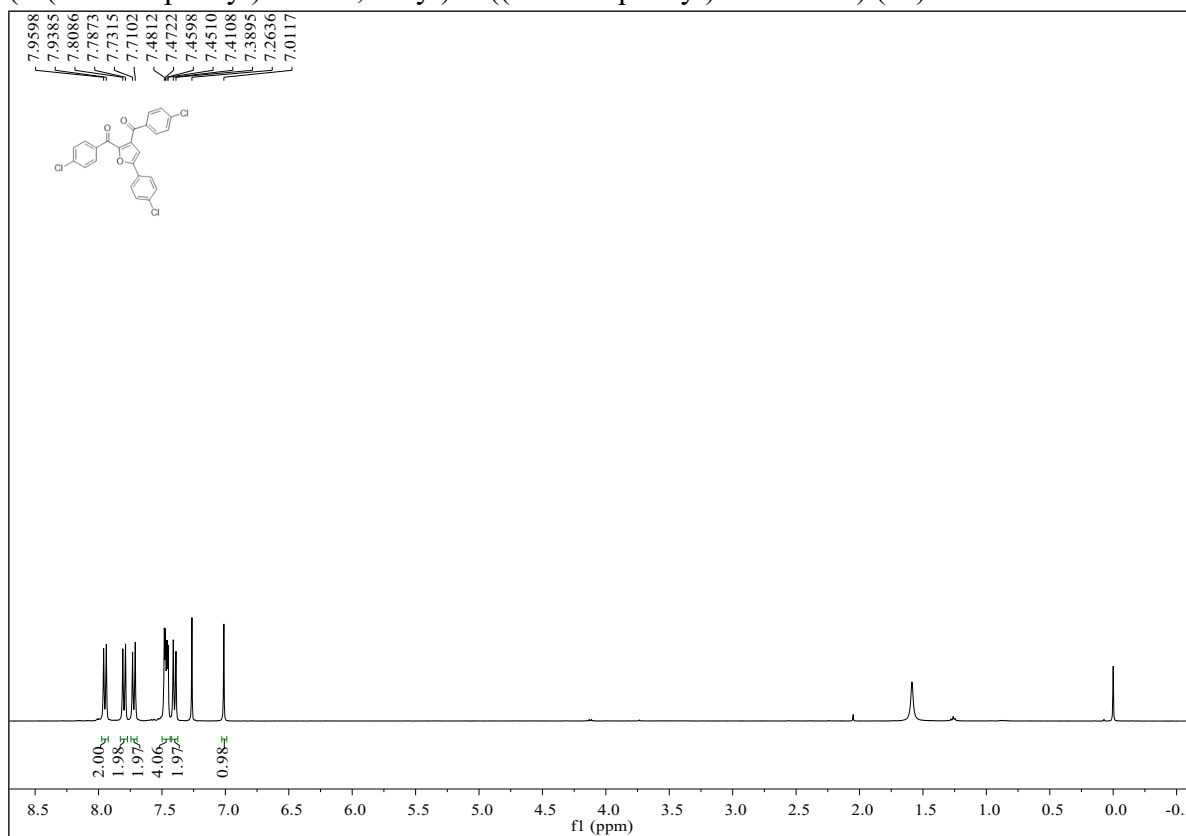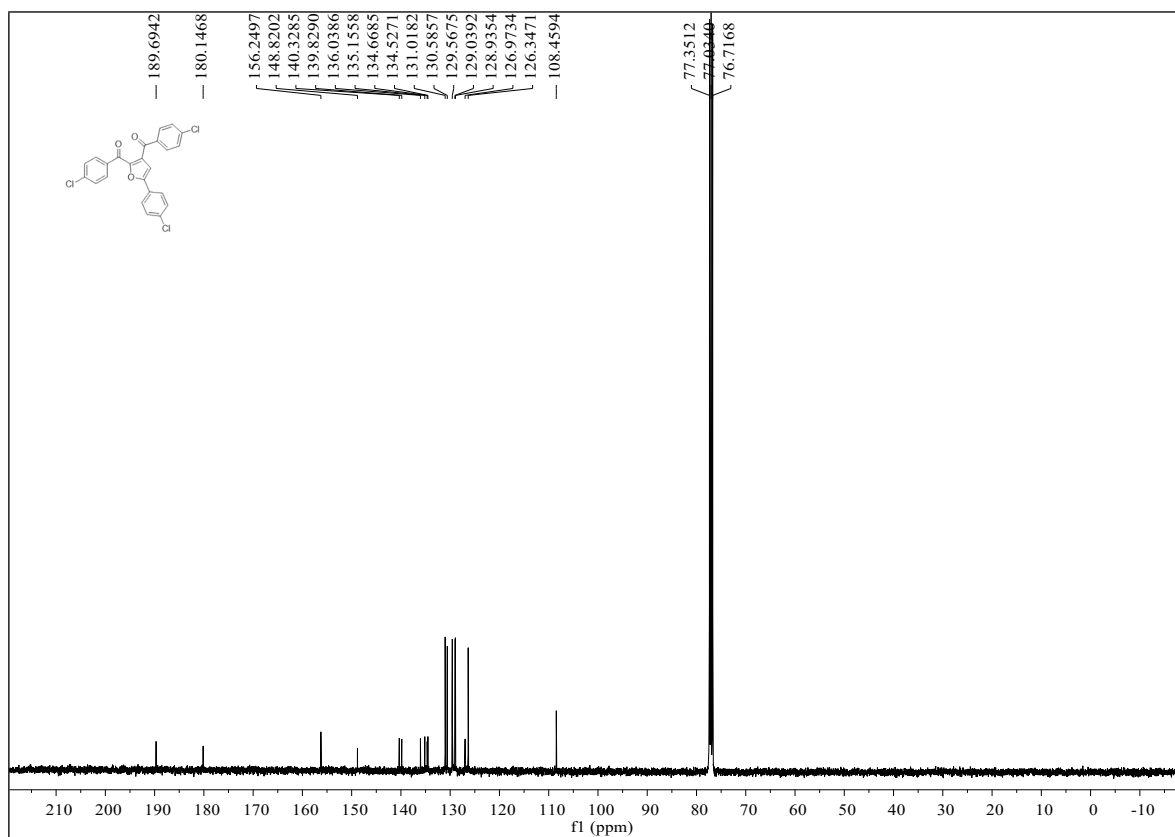

(5-([1,1'-biphenyl]-4-yl)furan-2,3-diyl)bis([1,1'-biphenyl]-4-ylmethanone) (**2f**)

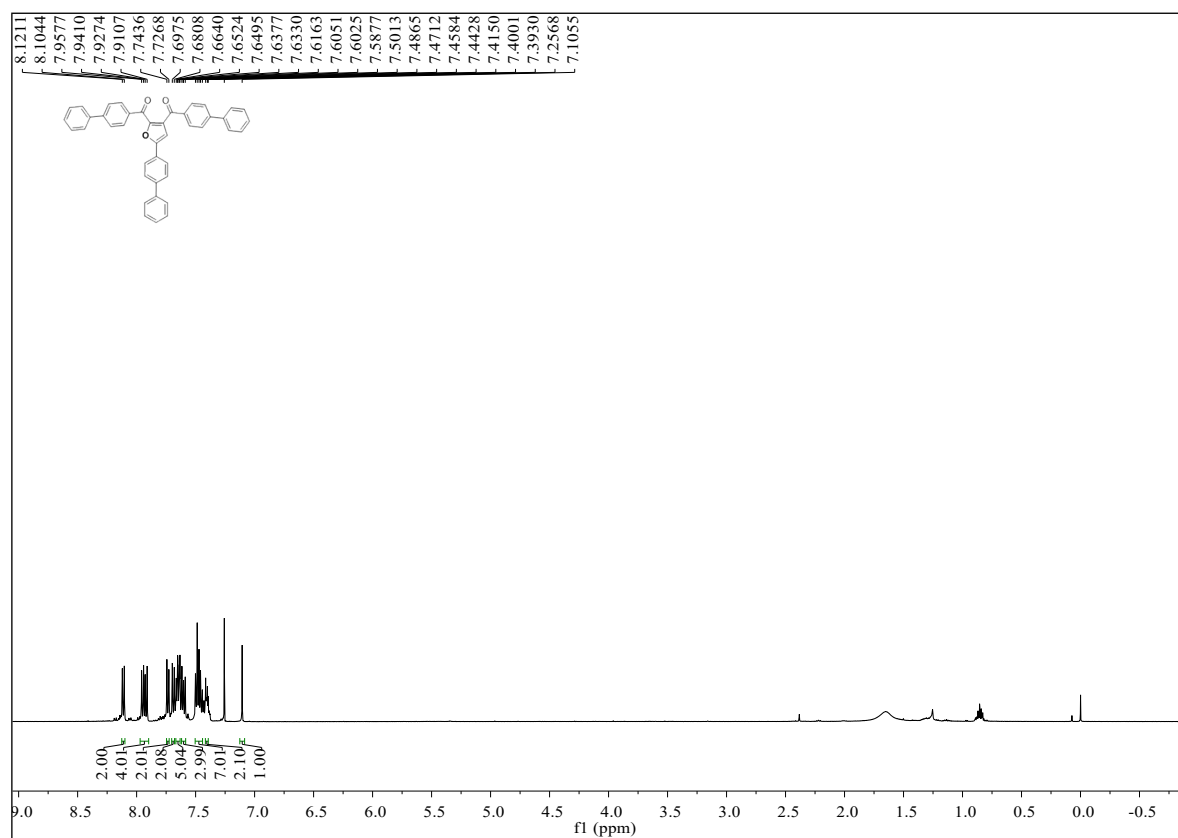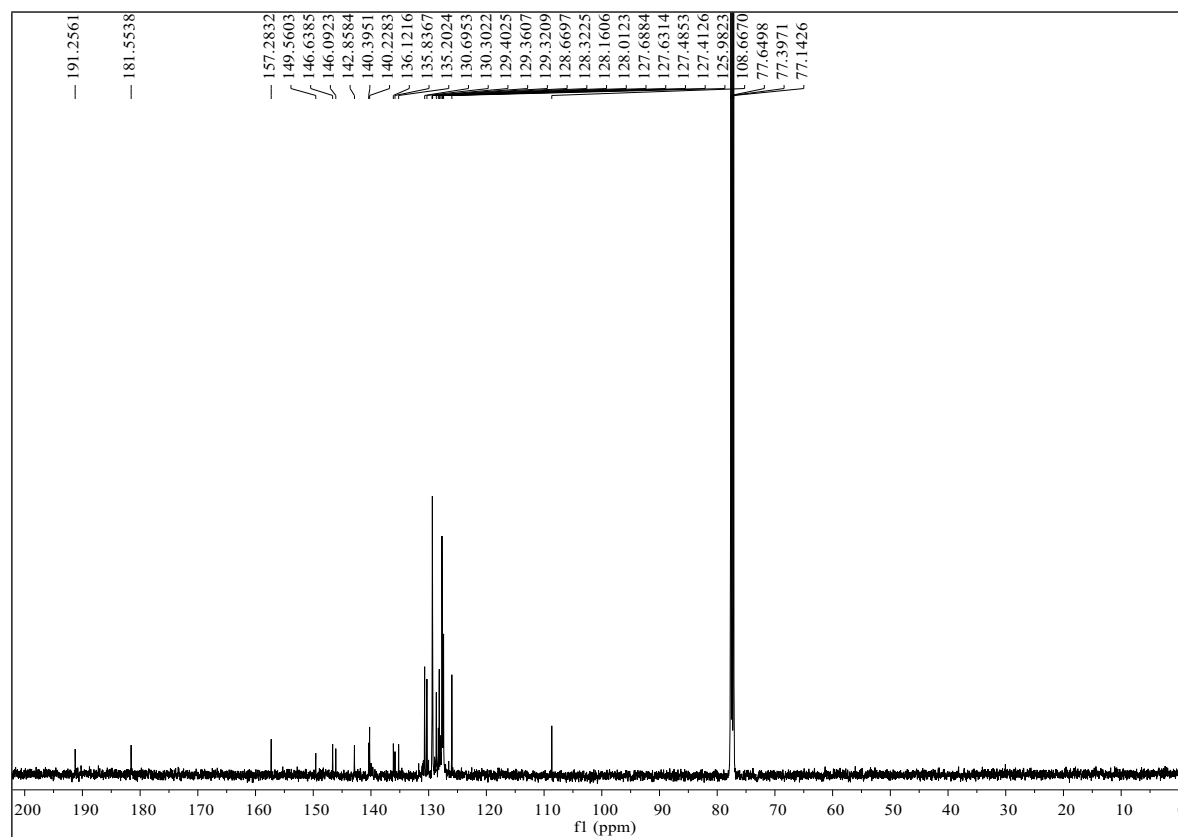

(5-(o-tolyl)furan-2,3-diyl)bis(o-tolylmethanone) (**2g**)

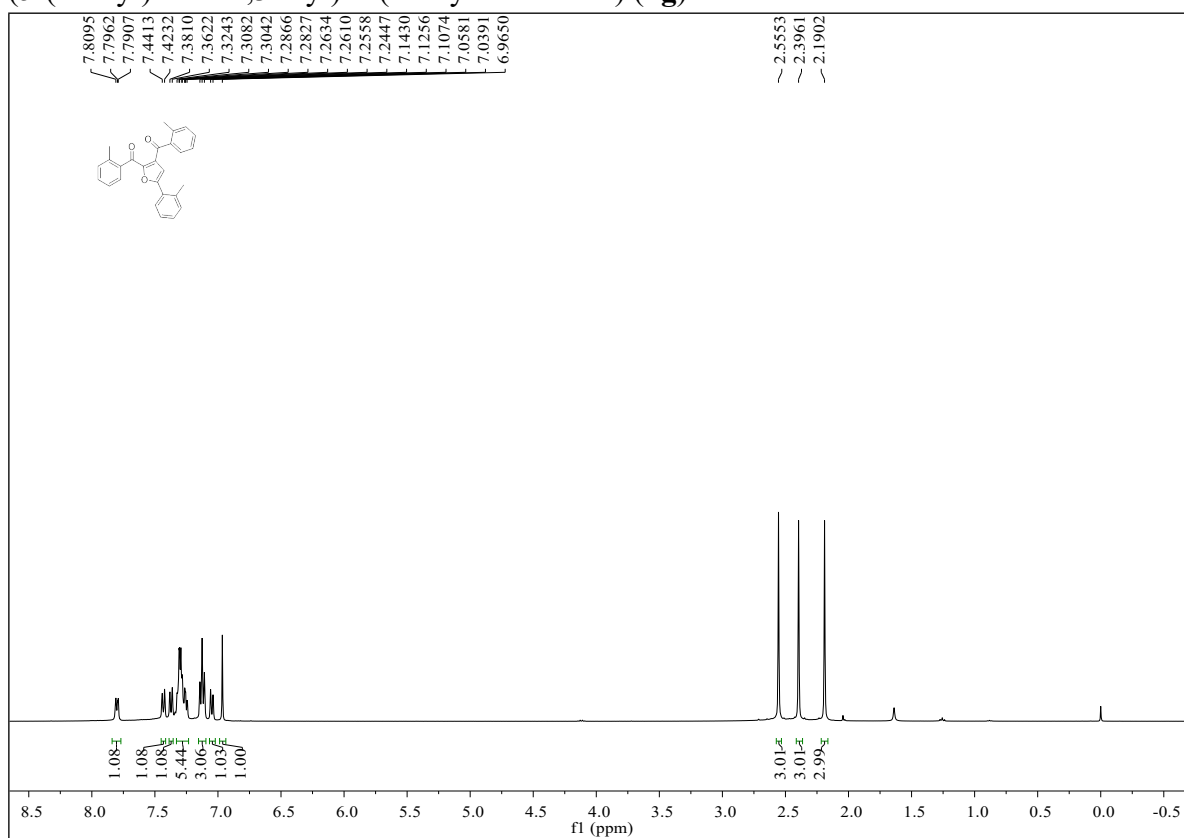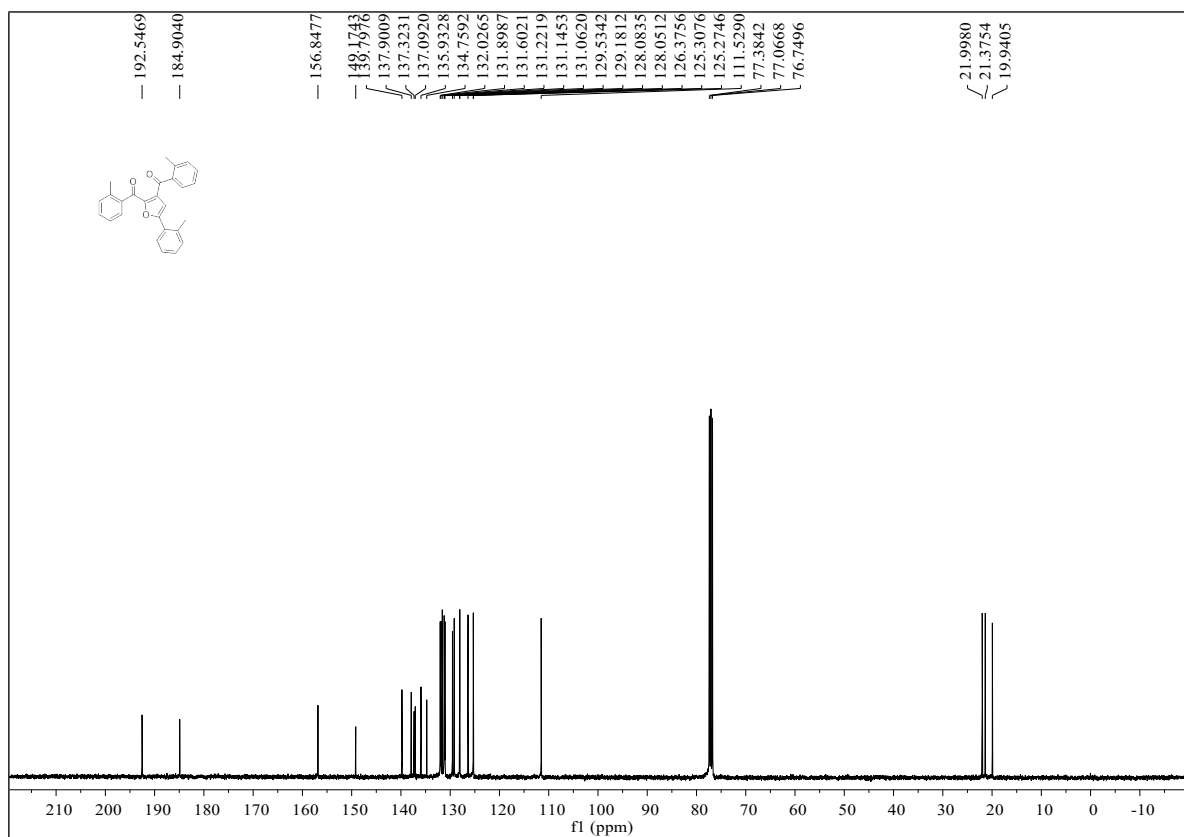

(5-(2-methoxyphenyl)furan-2,3-diyl)bis((2-methoxyphenyl)methanone) (**2h**)

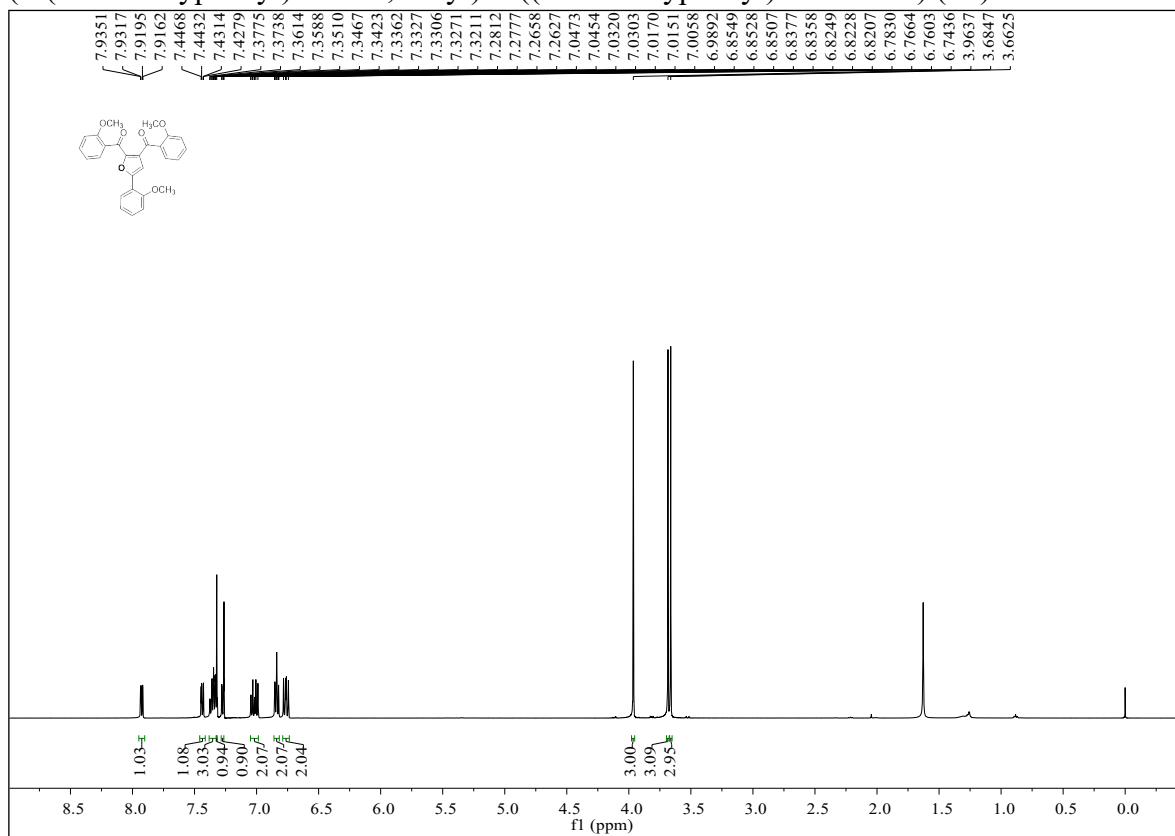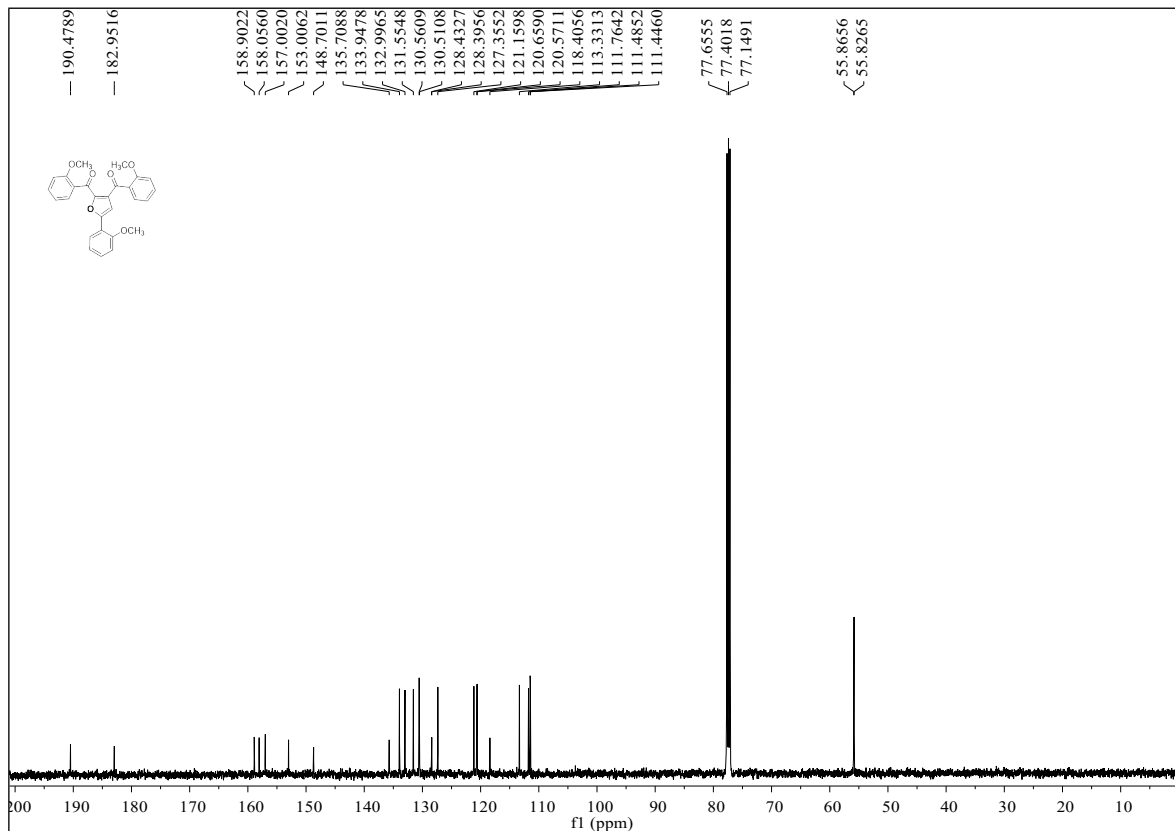

(5-(m-tolyl)furan-2,3-diyl)bis(m-tolylmethanone) (**2i**)

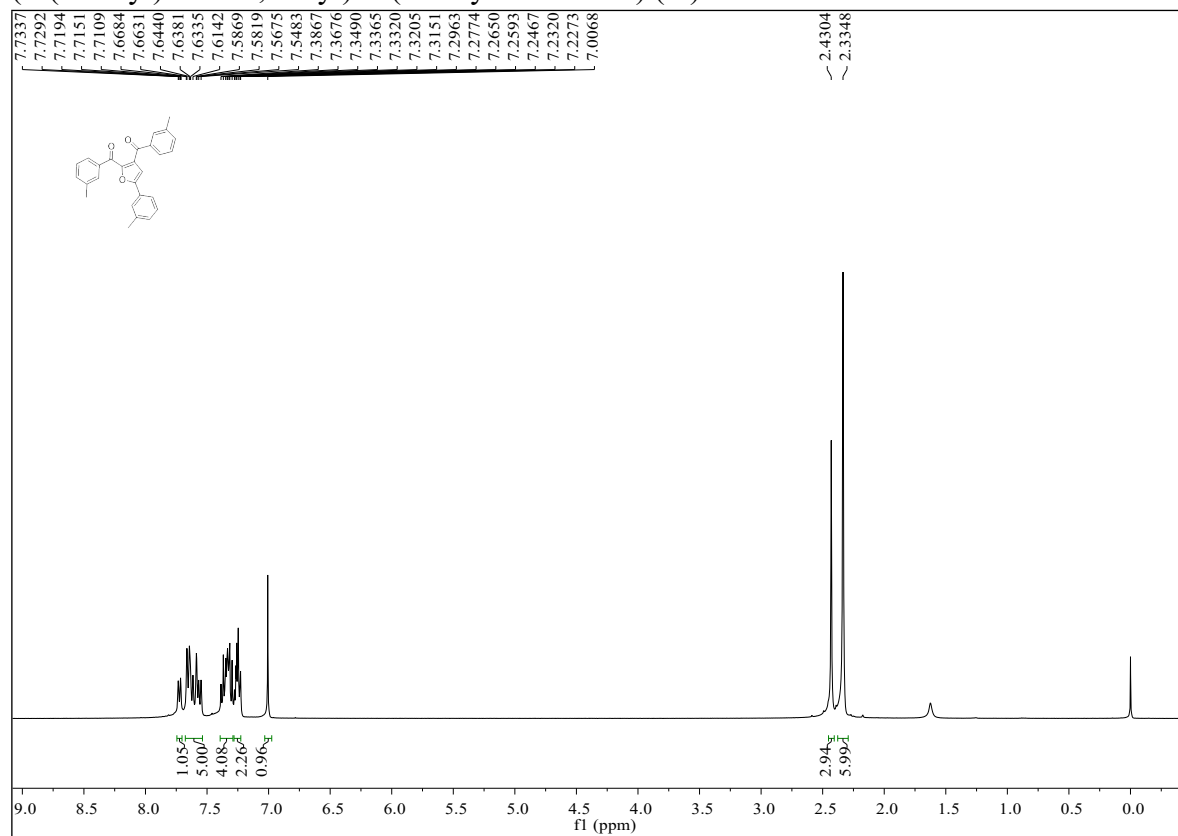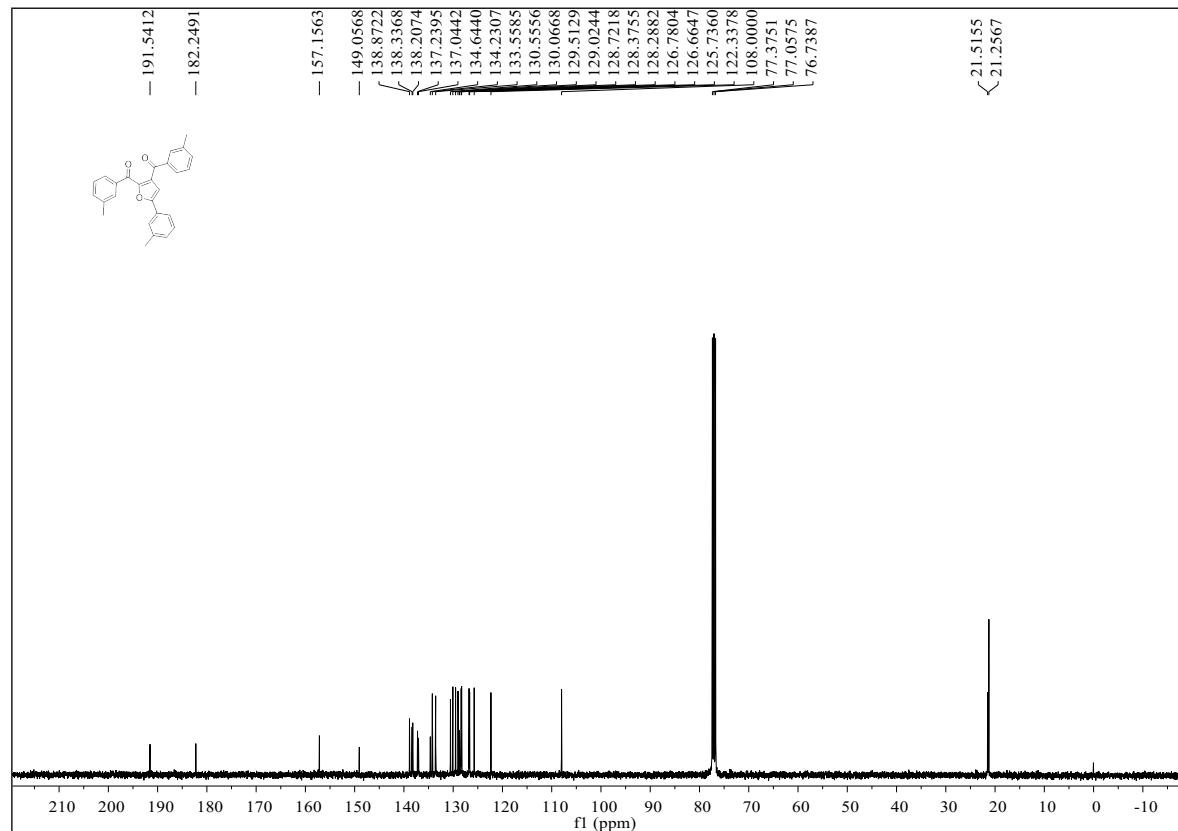

(5-(3-methoxyphenyl)furan-2,3-diyl)bis((3-methoxyphenyl)methanone) (**2j**)

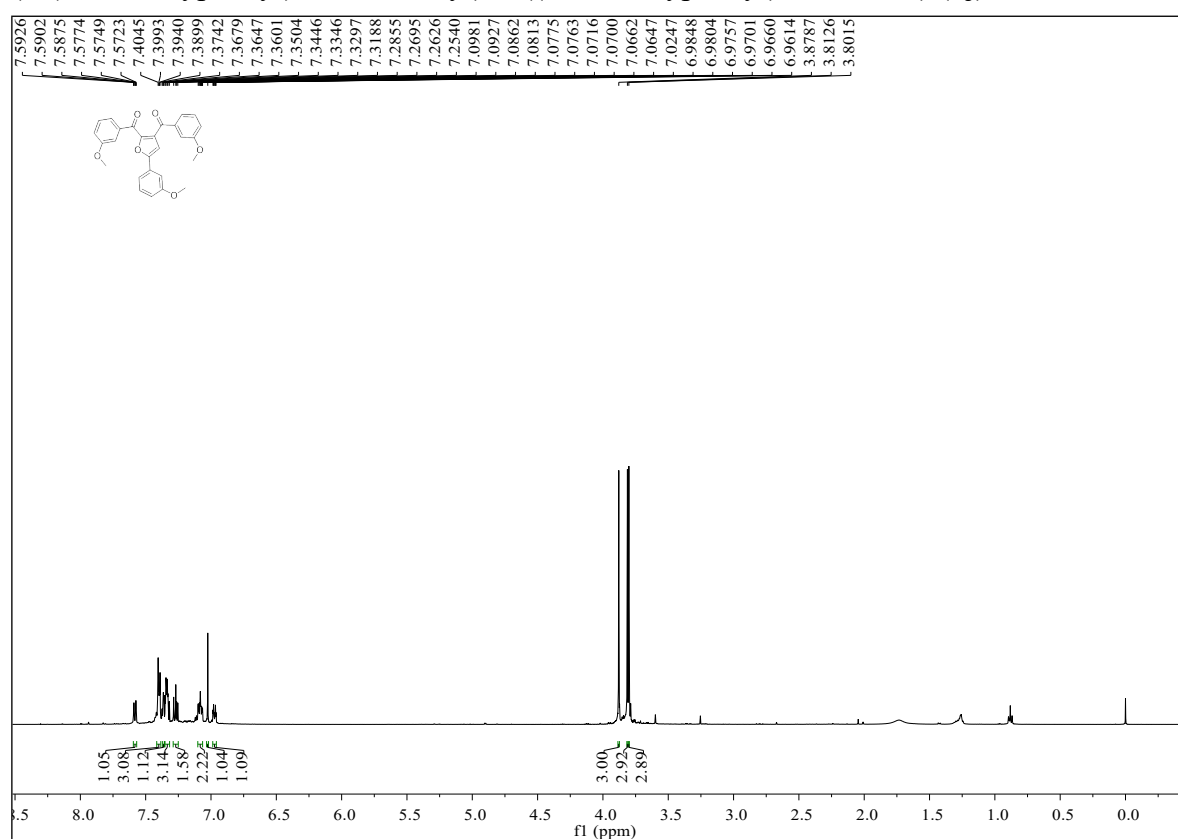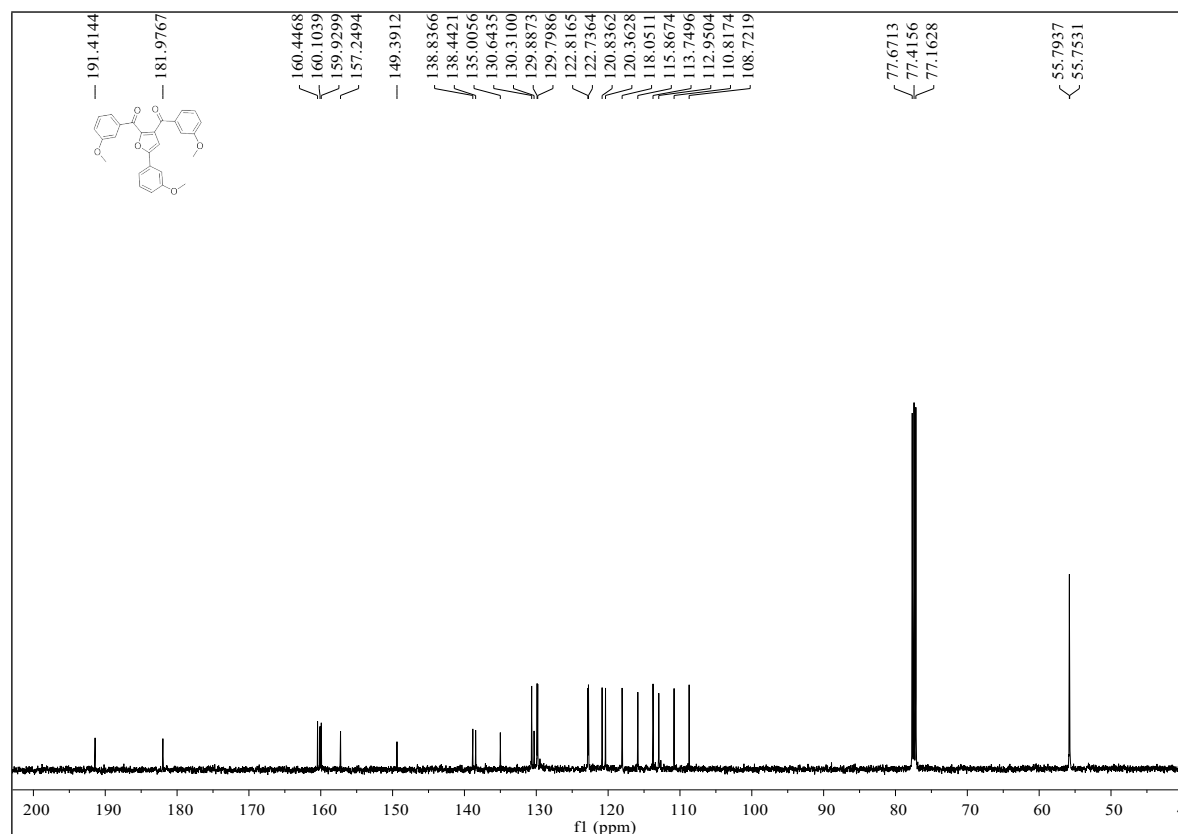

(5-(3-fluorophenyl)furan-2,3-diyl)bis((3-fluorophenyl)methanone) (**2k**)

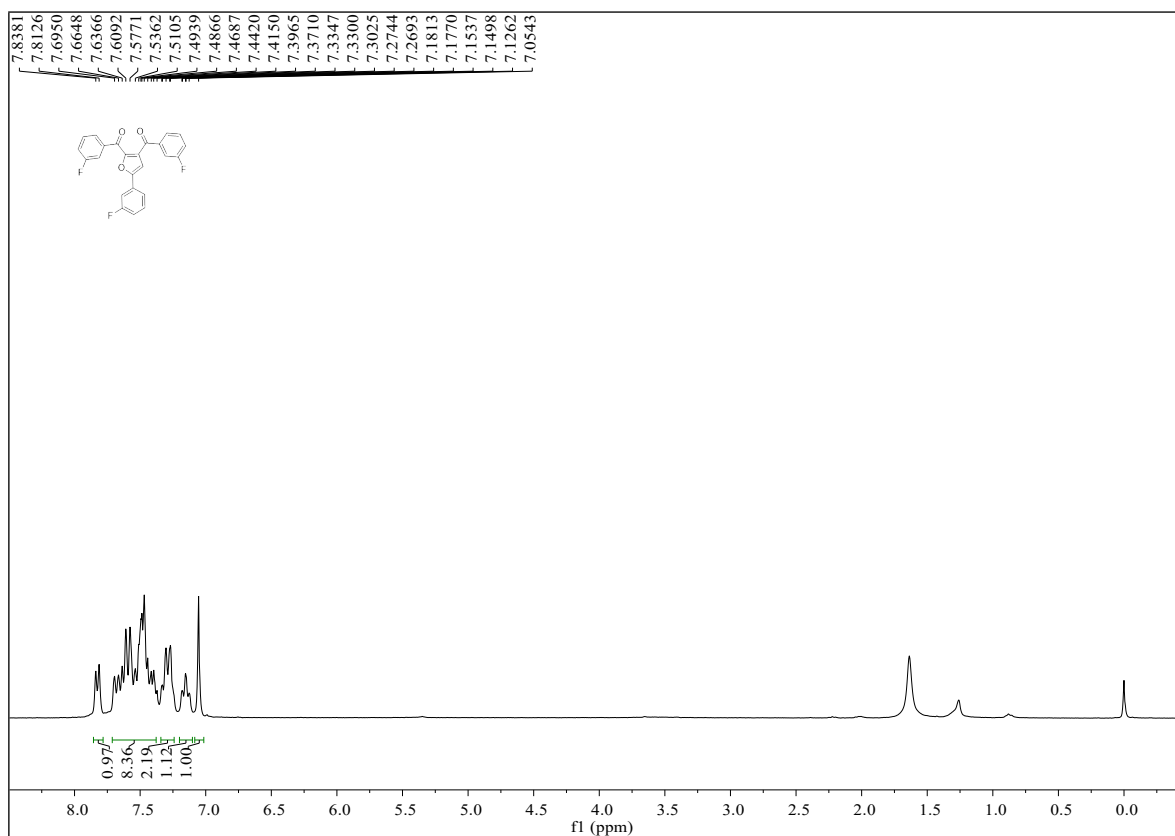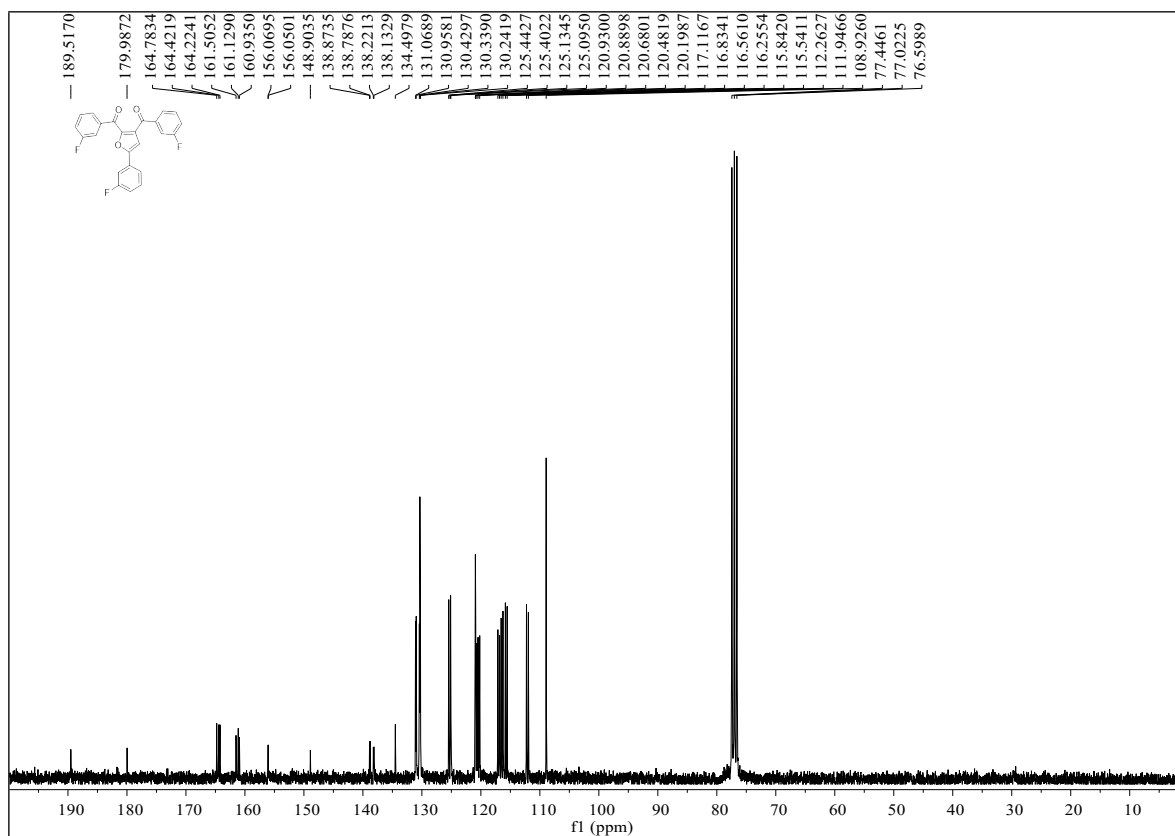

(5-(3-chlorophenyl)furan-2,3-diyl)bis((3-chlorophenyl)methanone) (**2l**)

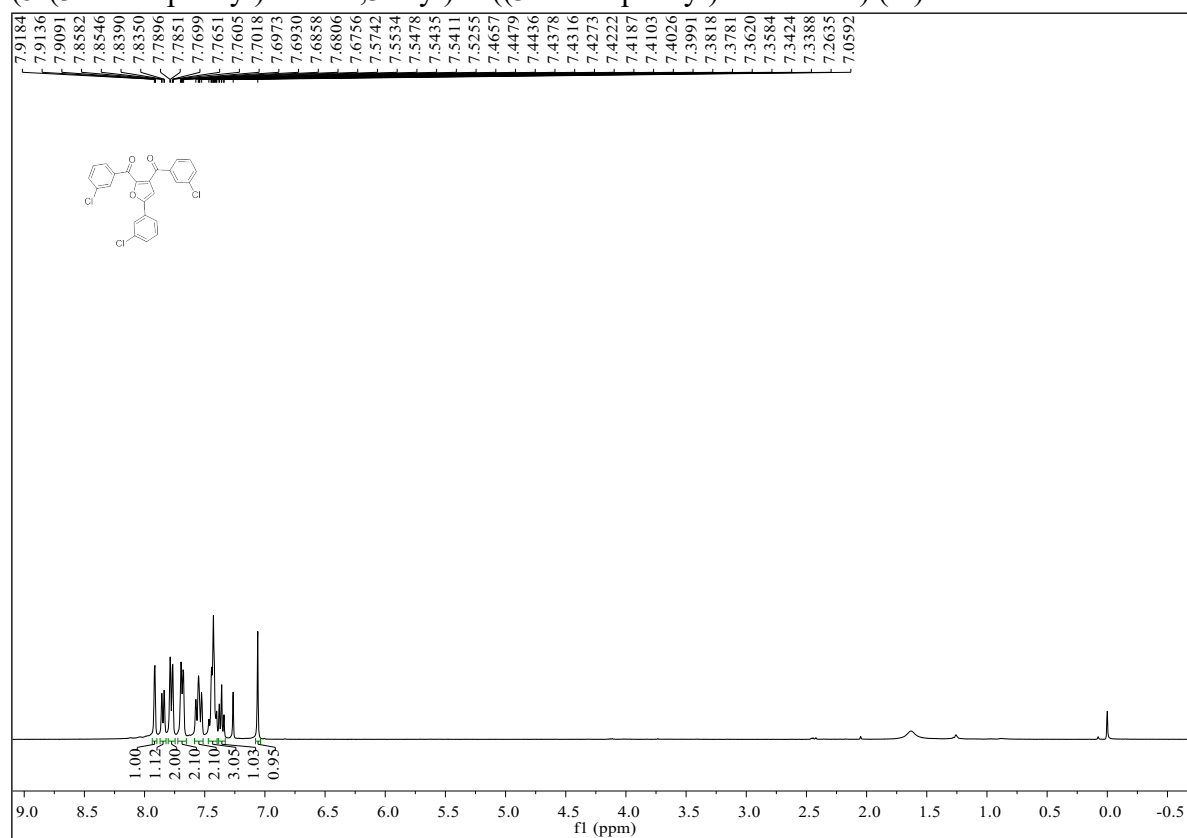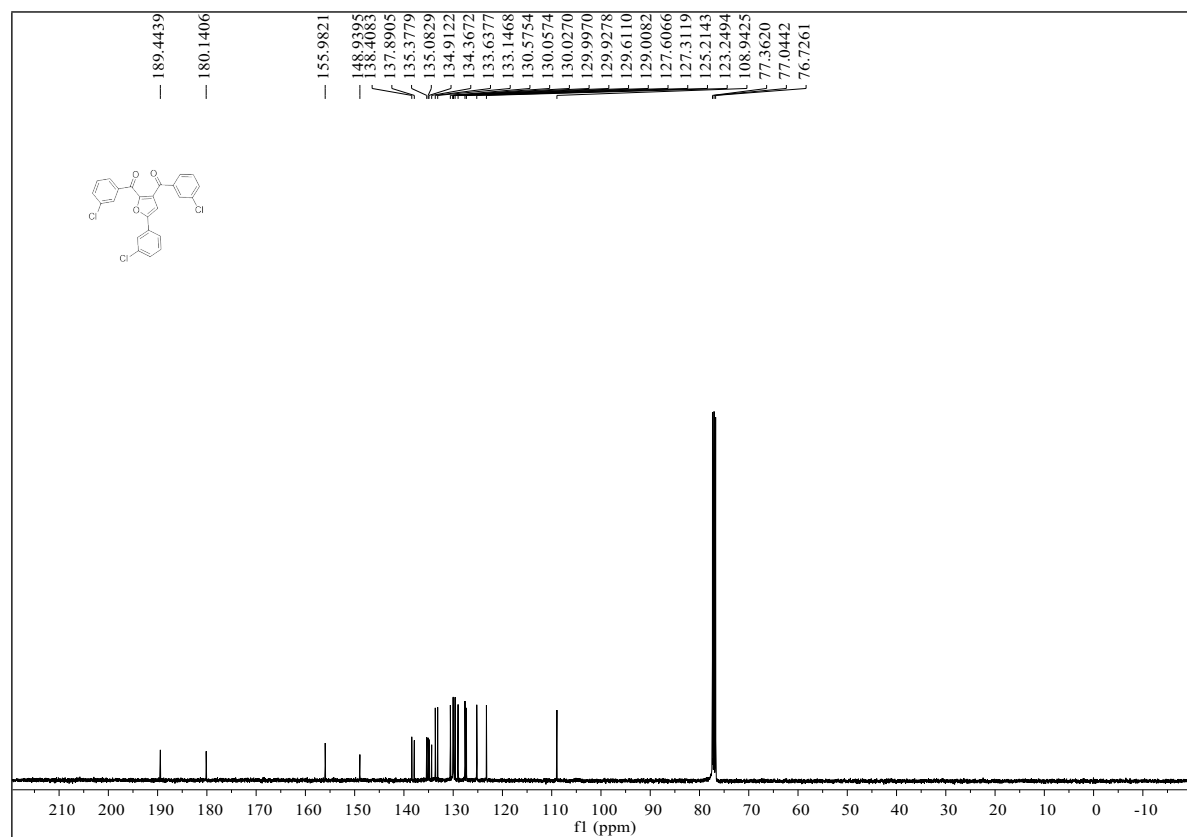

(5-(3-bromophenyl)furan-2,3-diyl)bis((3-bromophenyl)methanone) (**2m**)

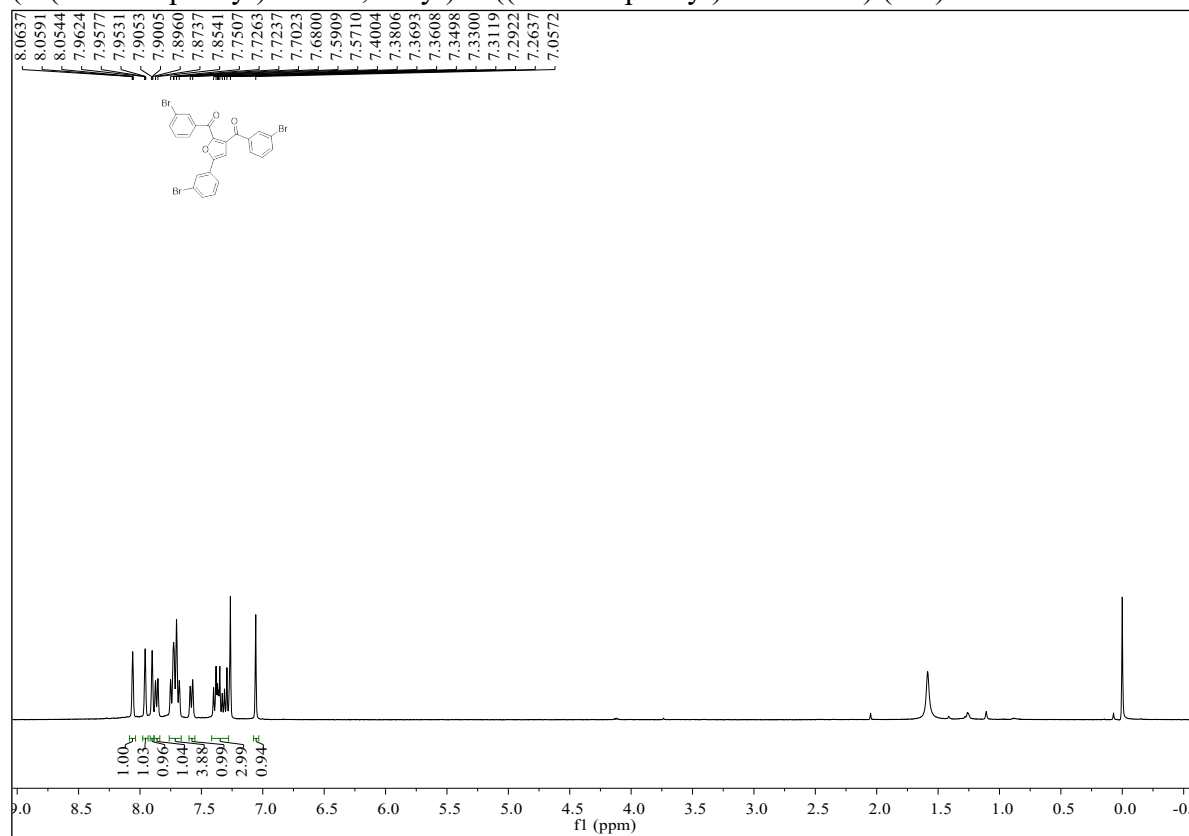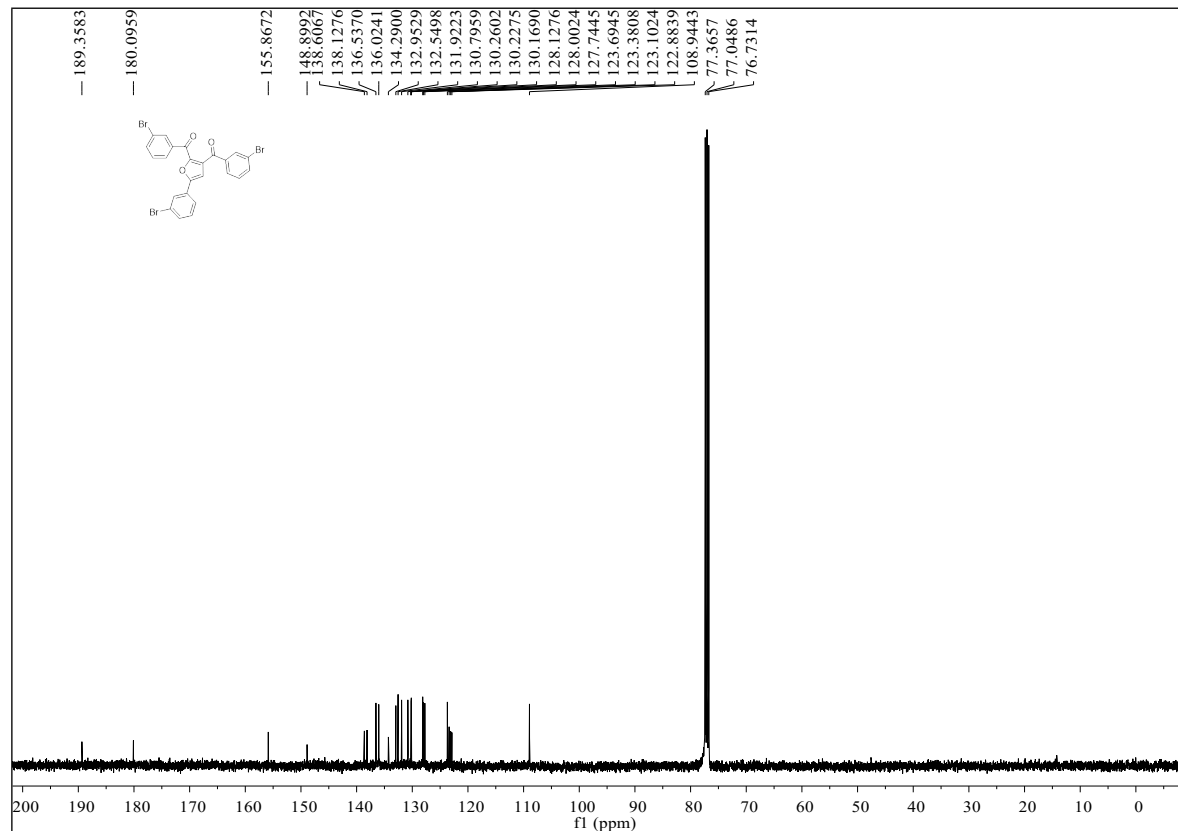

(5-([1,1'-biphenyl]-3-yl)furan-2,3-diyl)bis([1,1'-biphenyl]-3-ylmethanone) (**2n**)

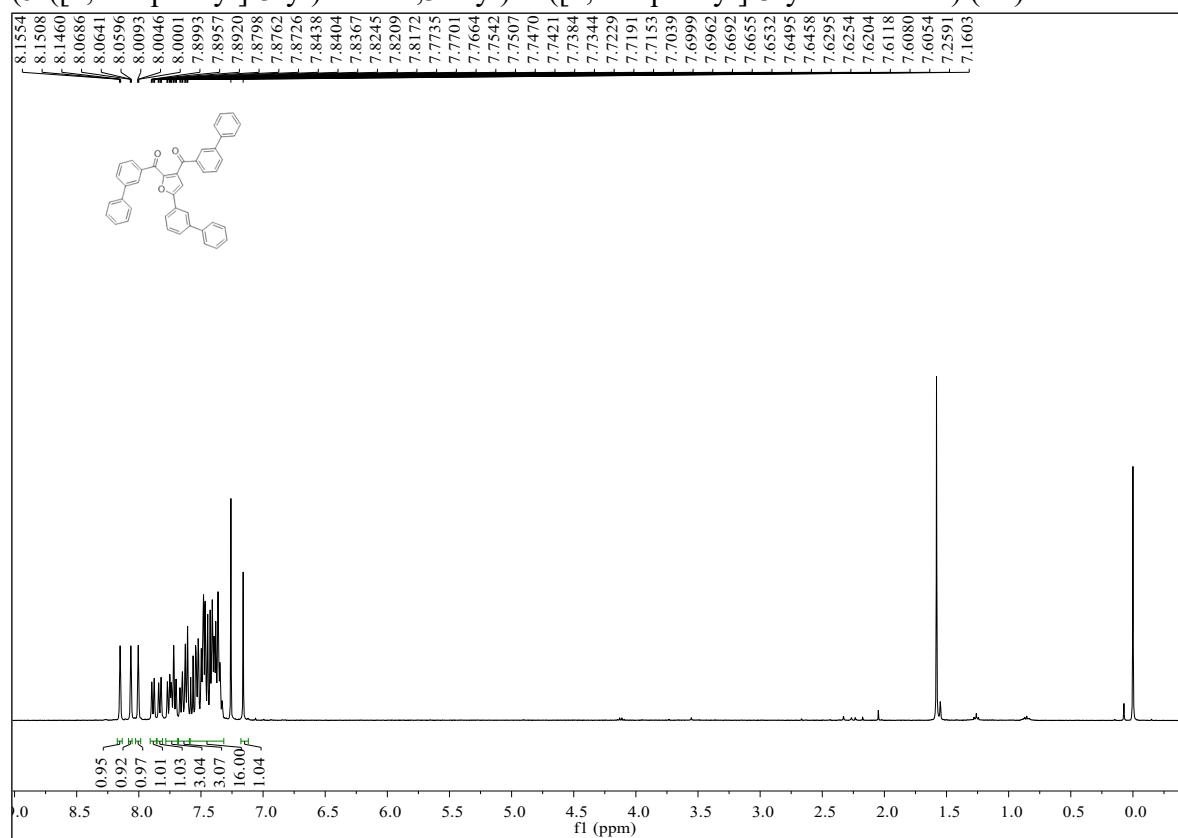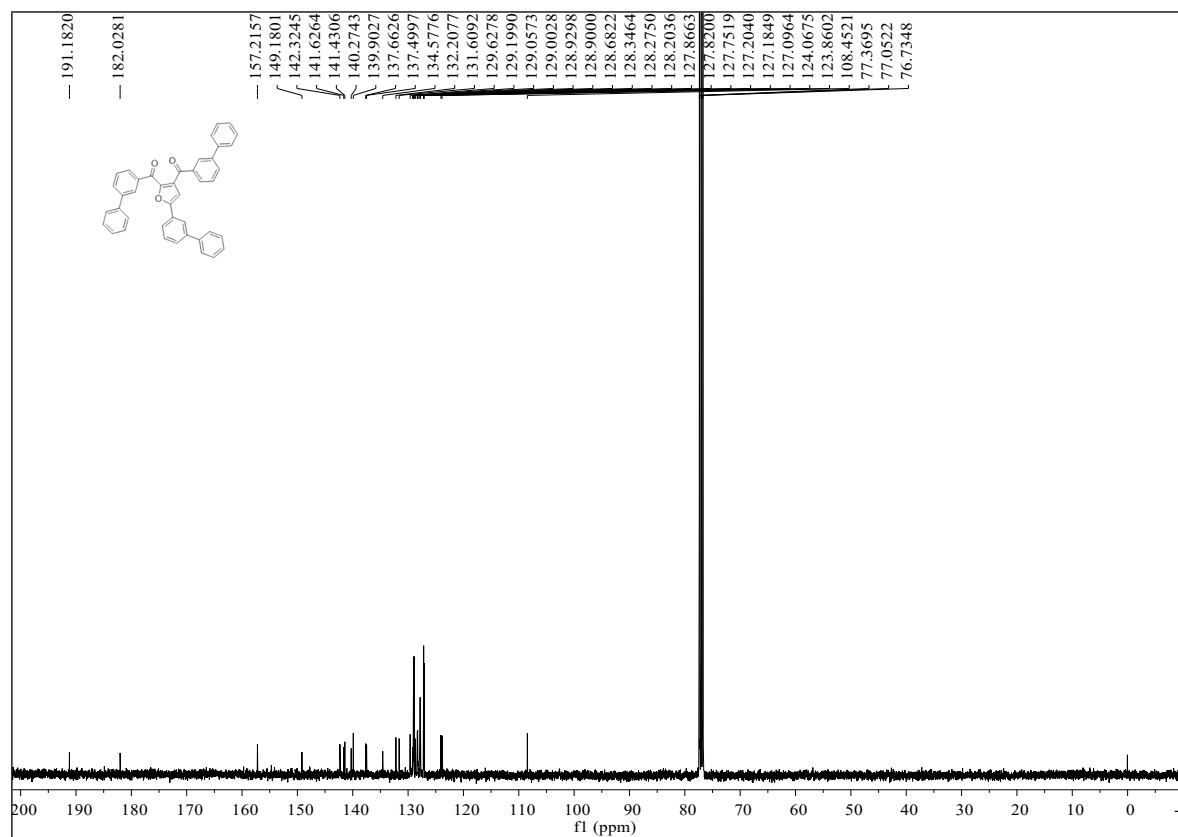

(5-(3-(trifluoromethyl)phenyl)furan-2,3-diyl)bis((3-(trifluoromethyl)phenyl)methanone)

(20)

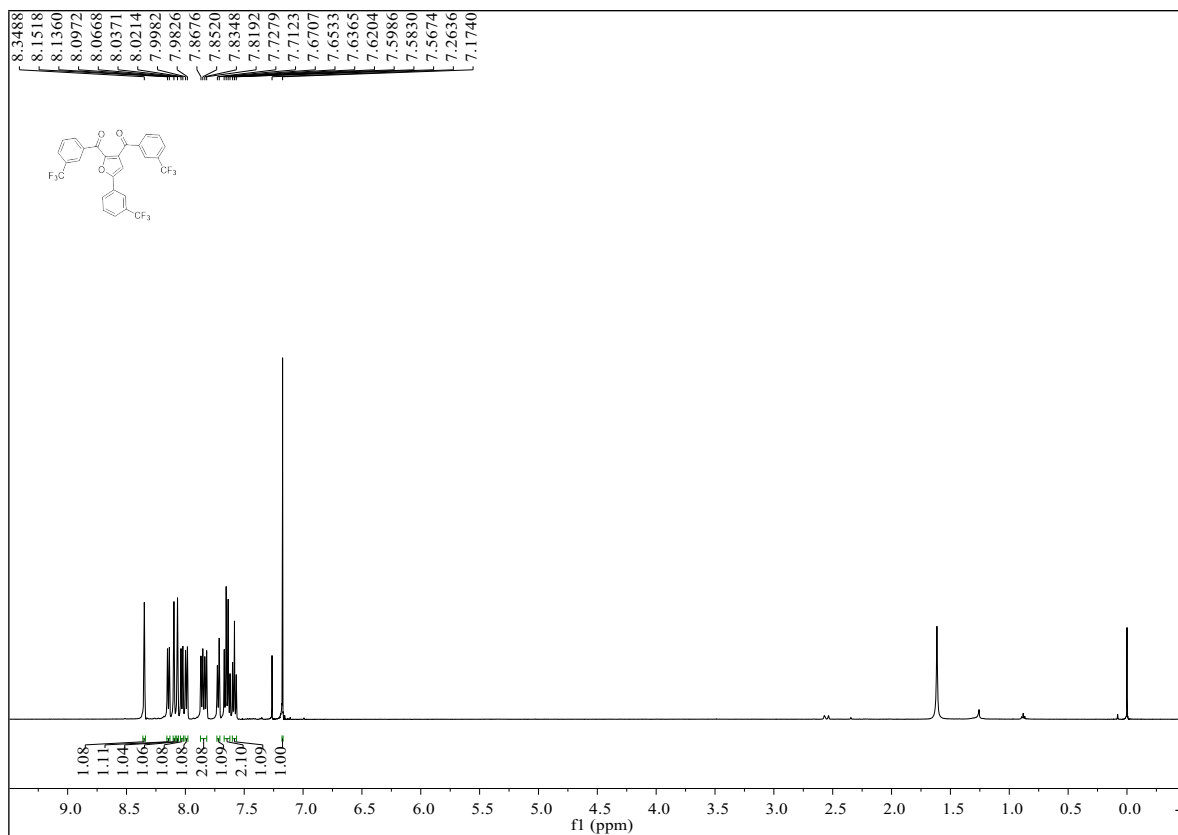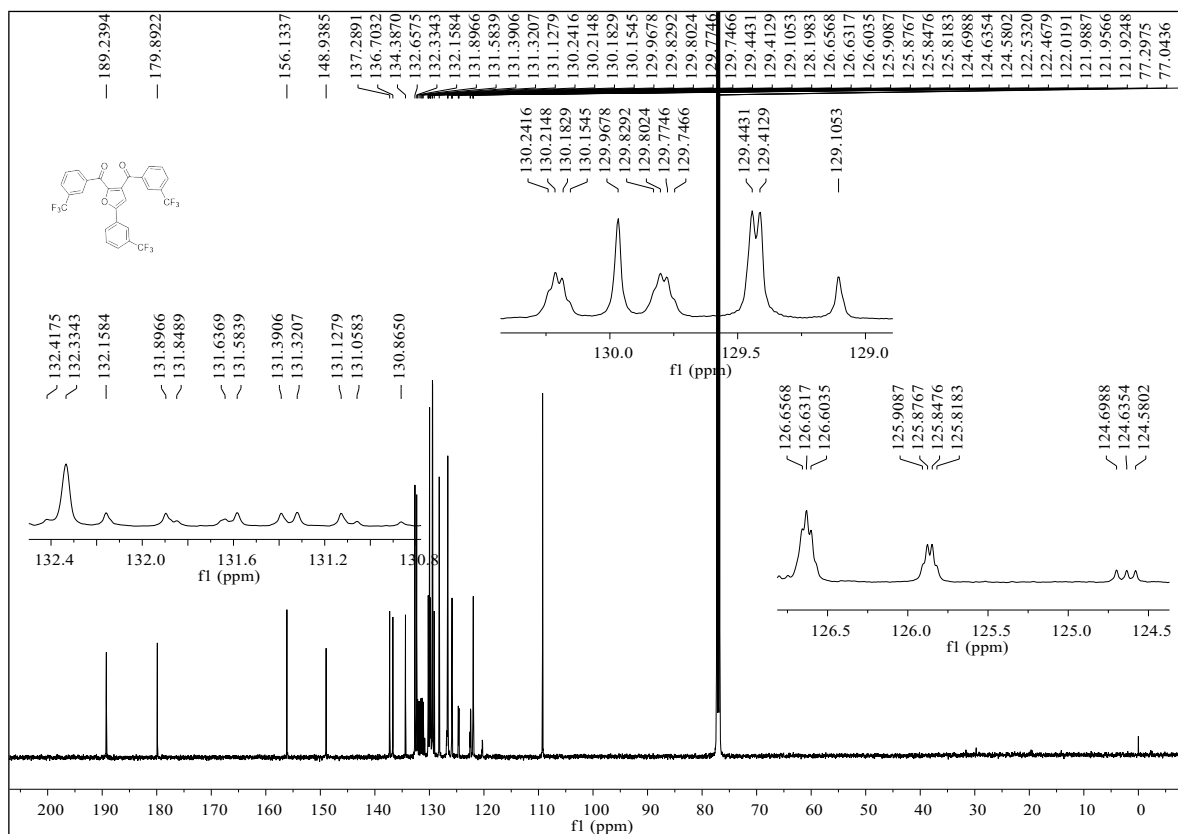

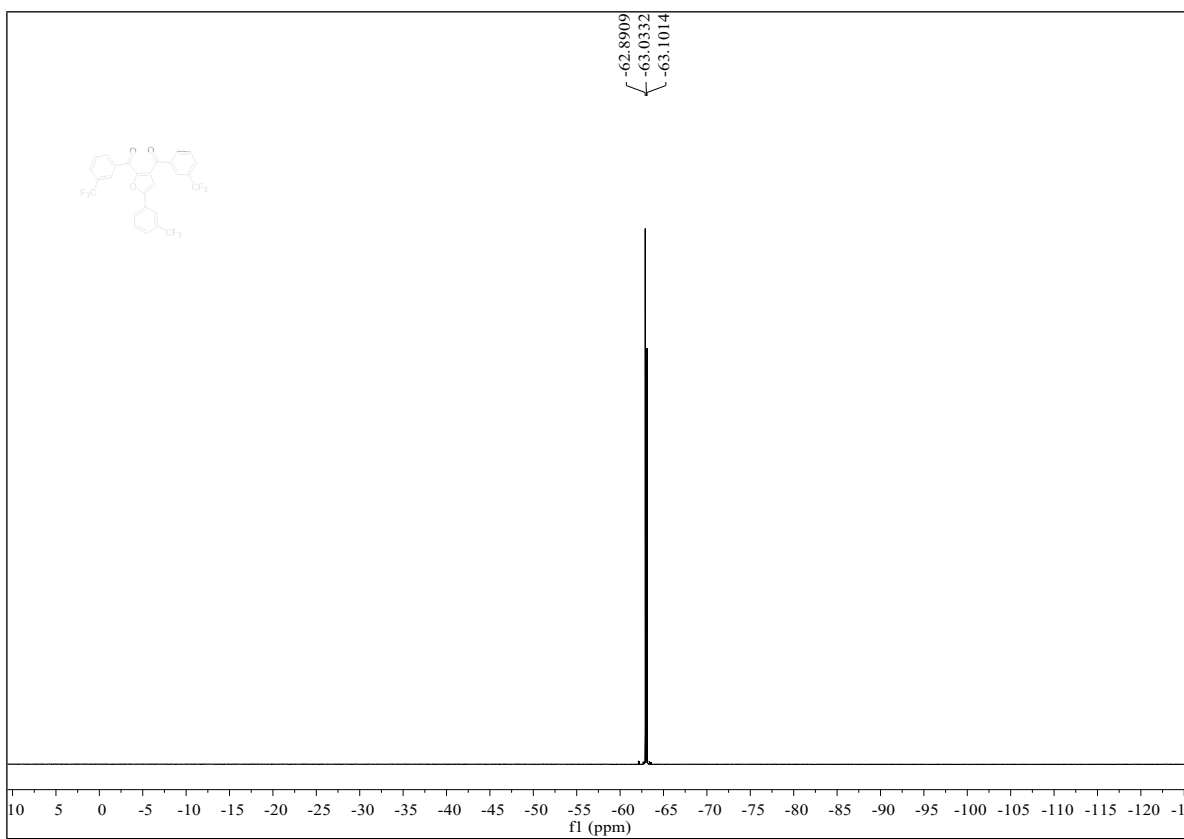

(5-(3,5-dimethylphenyl)furan-2,3-diyl)bis((3,5-dimethylphenyl)methanone) (**2p**)

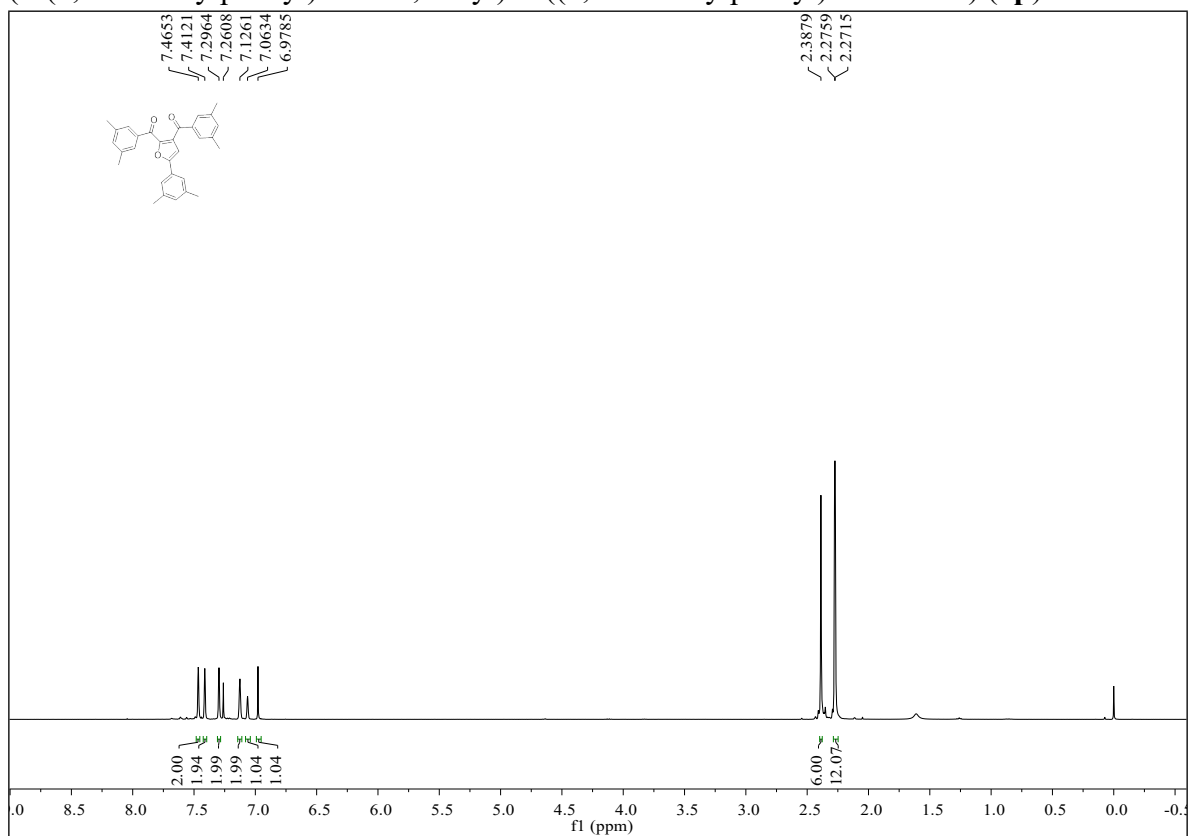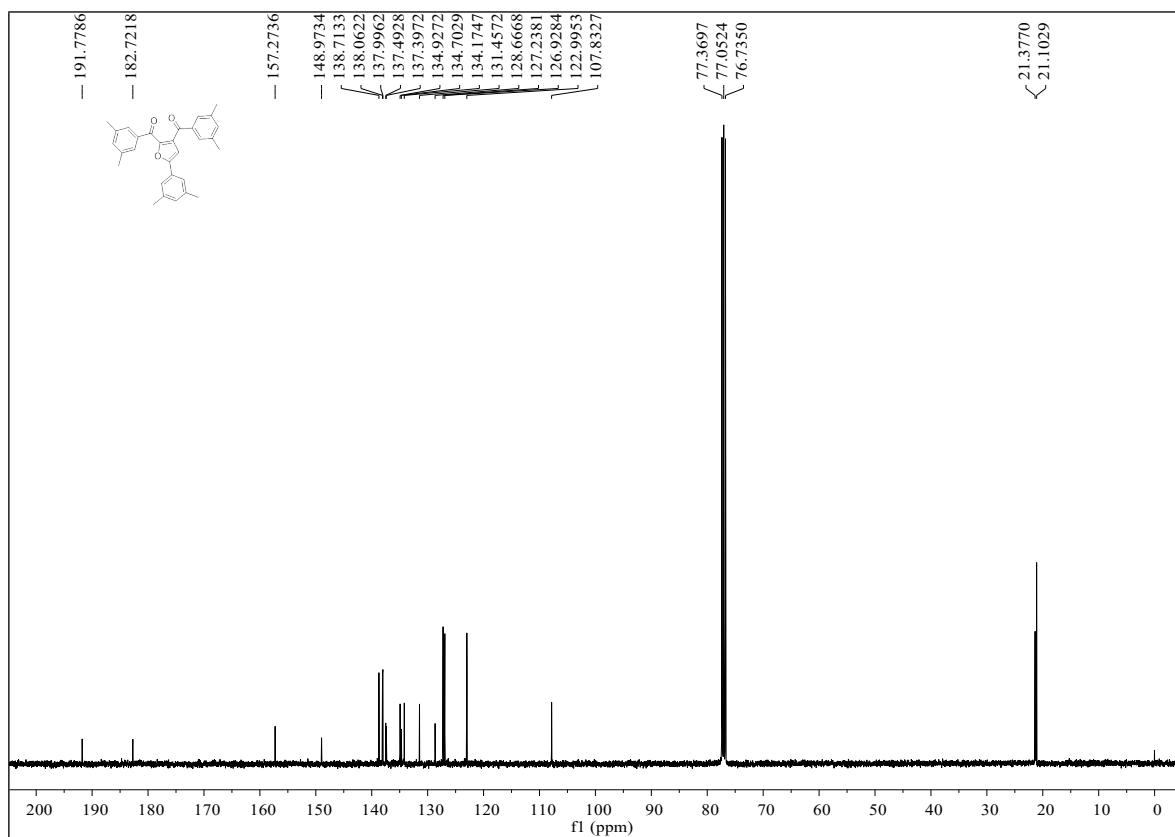

(5-mesitylfuran-2,3-diyl)bis(mesitylmethanone) (**2q**)

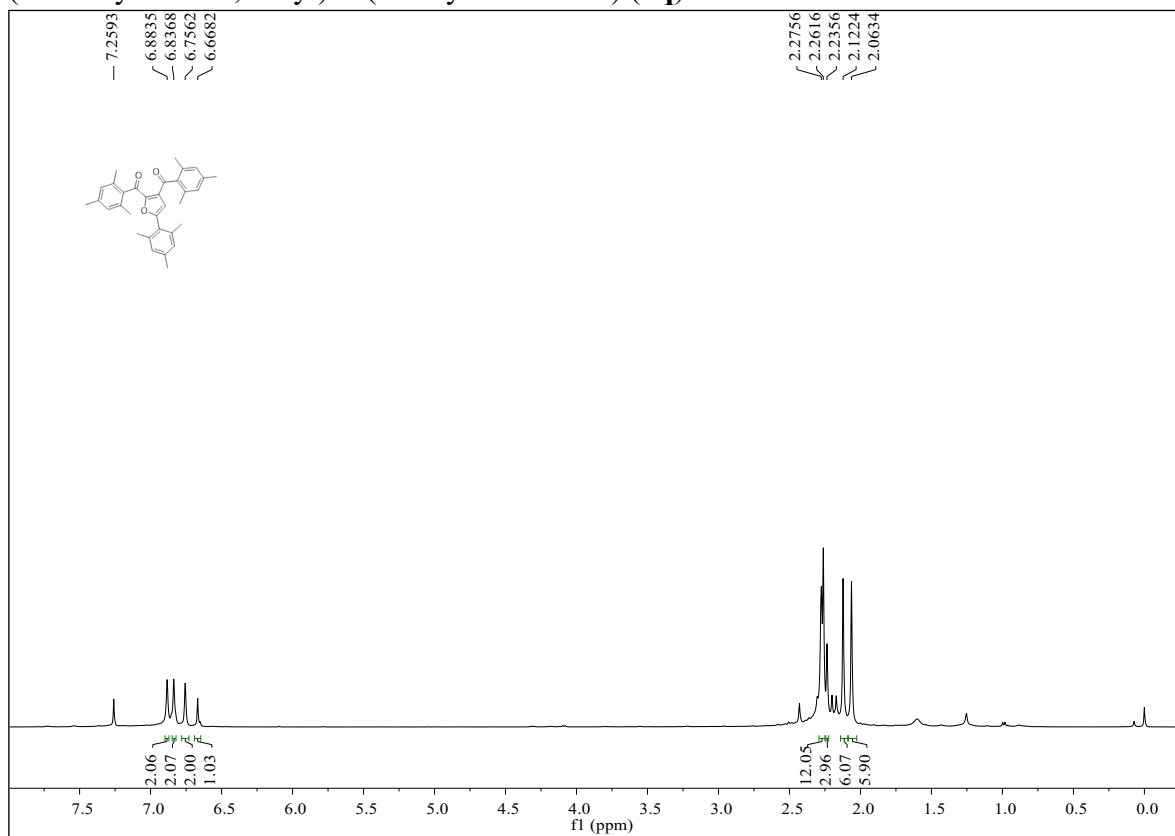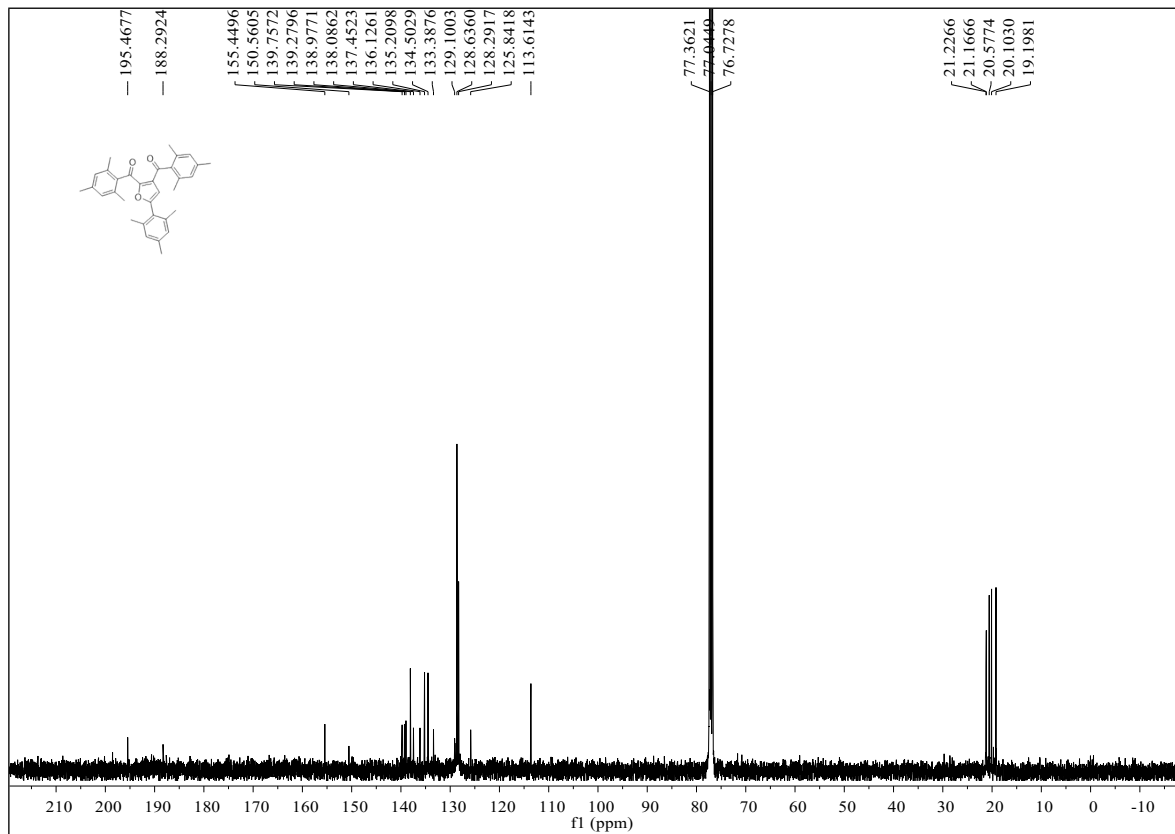

(5-(naphthalen-1-yl)furan-2,3-diyl)bis(naphthalen-1-ylmethanone) (**2r**)

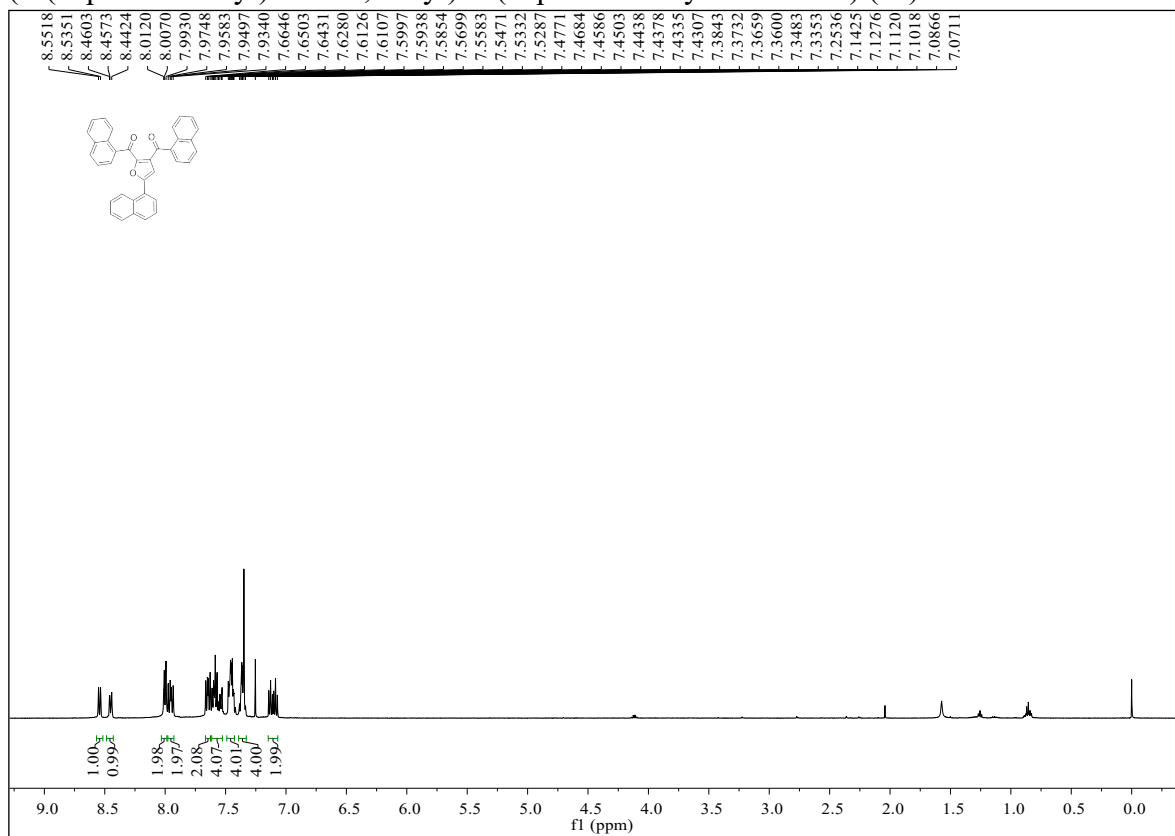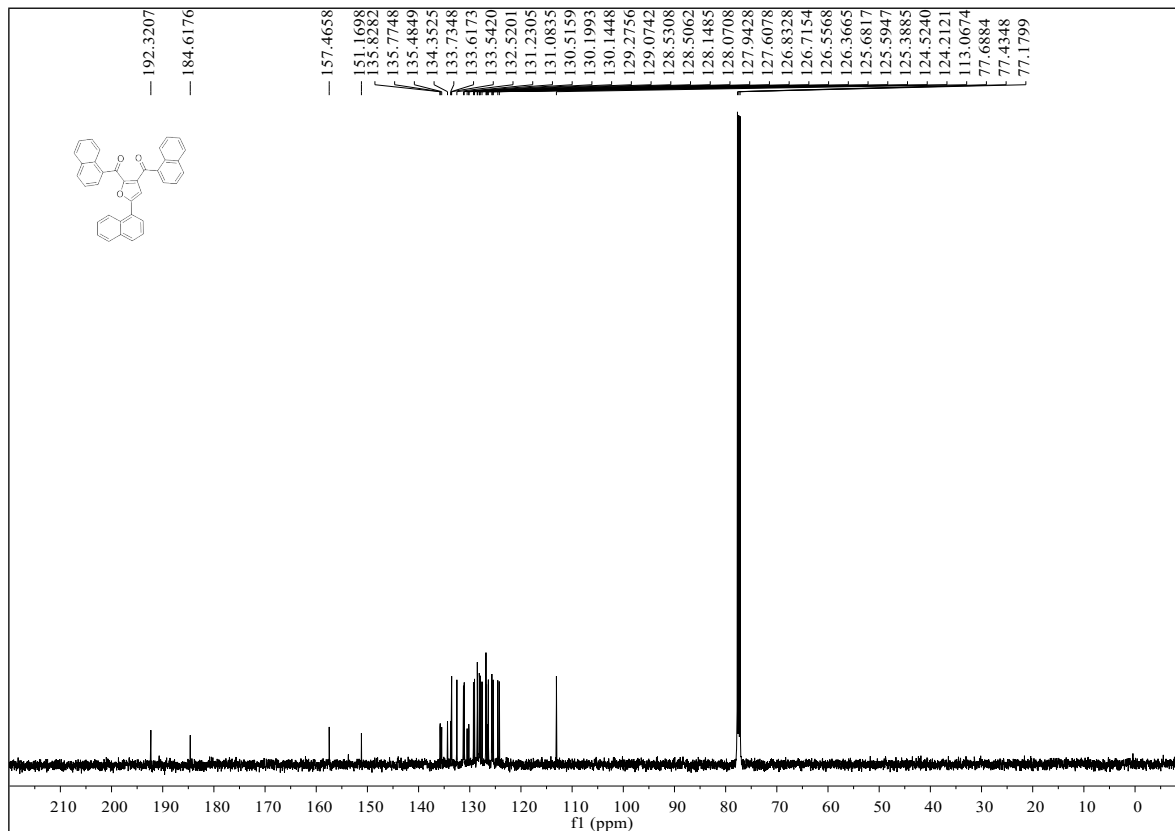

[2,2'-bifuran]-4,5-diylbis(furan-2-ylmethanone) (**2s**)

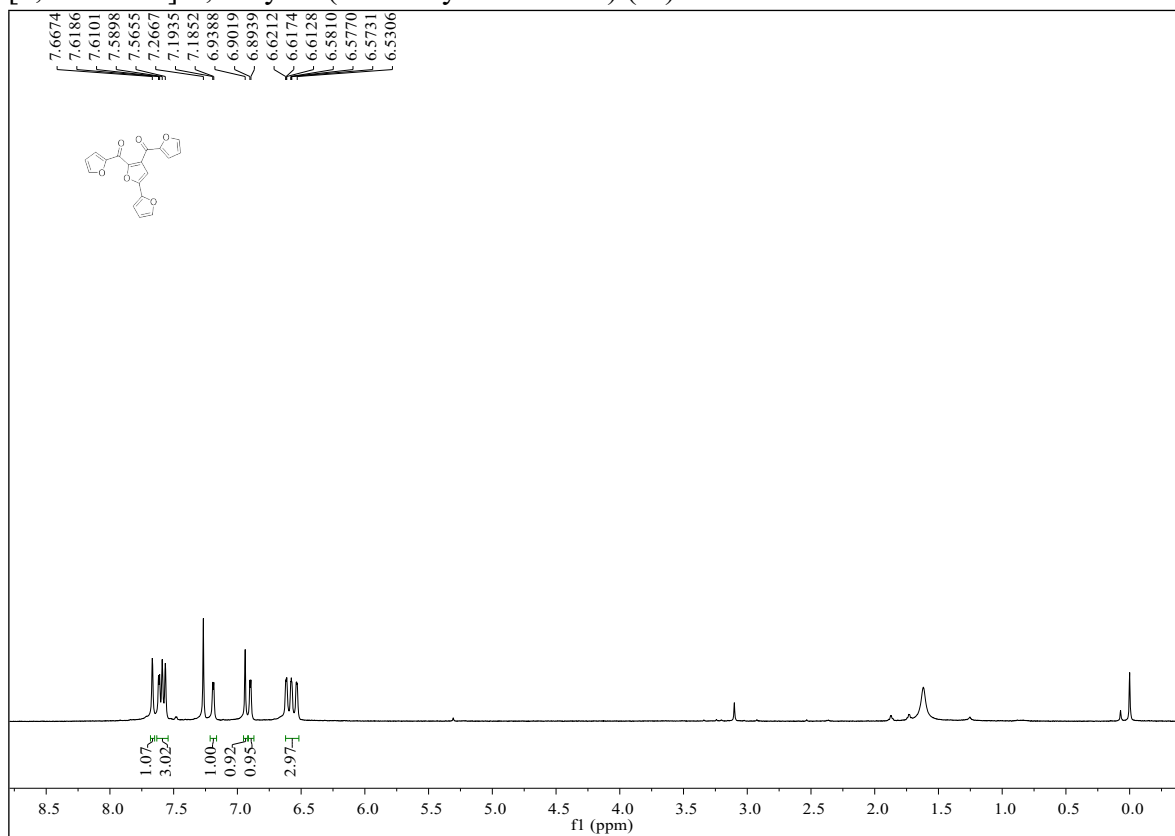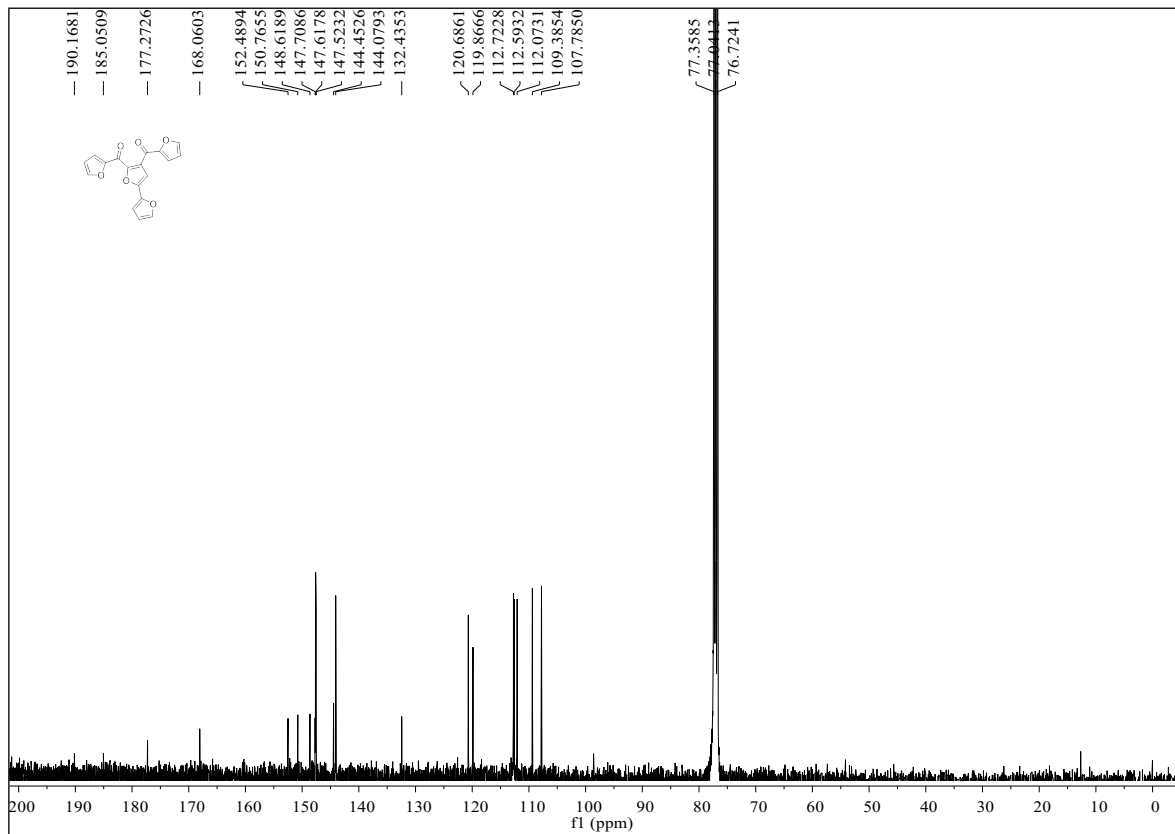

(5-(thiophen-2-yl)furan-2,3-diyl)bis(thiophen-2-ylmethanone) (**2t**)

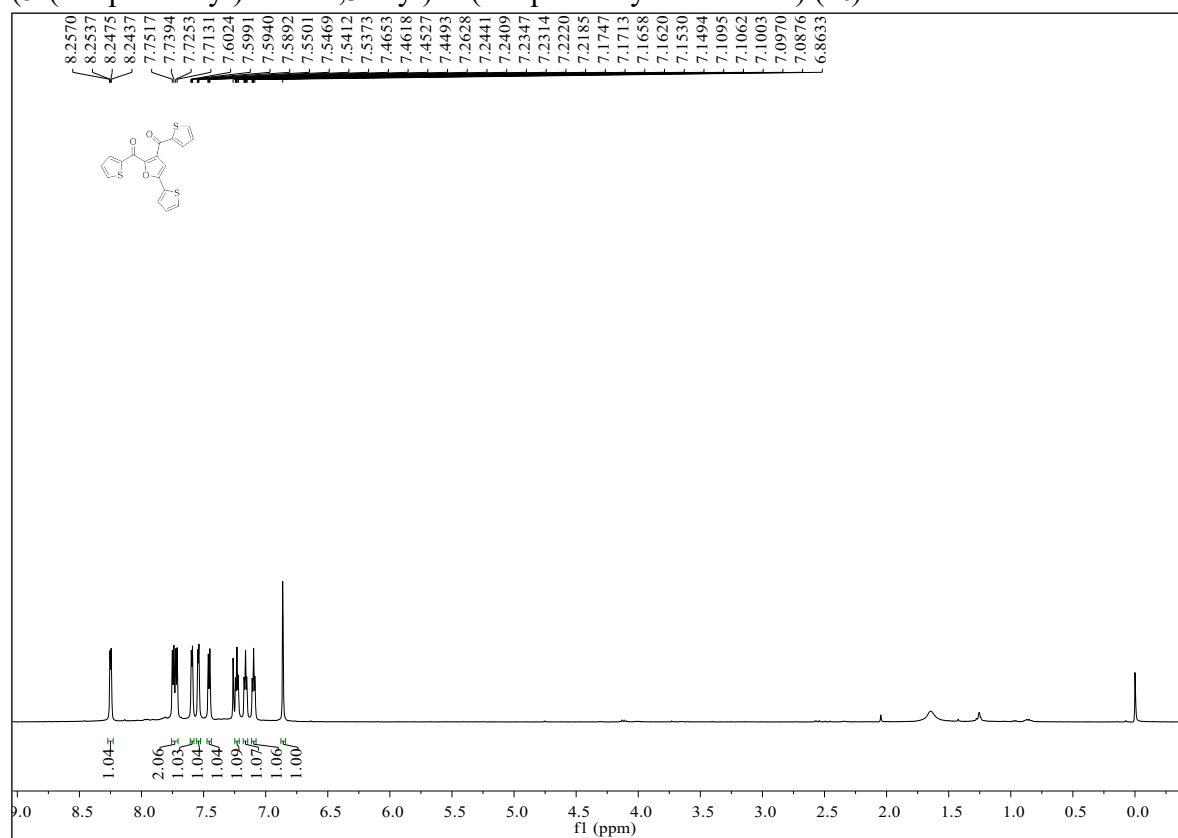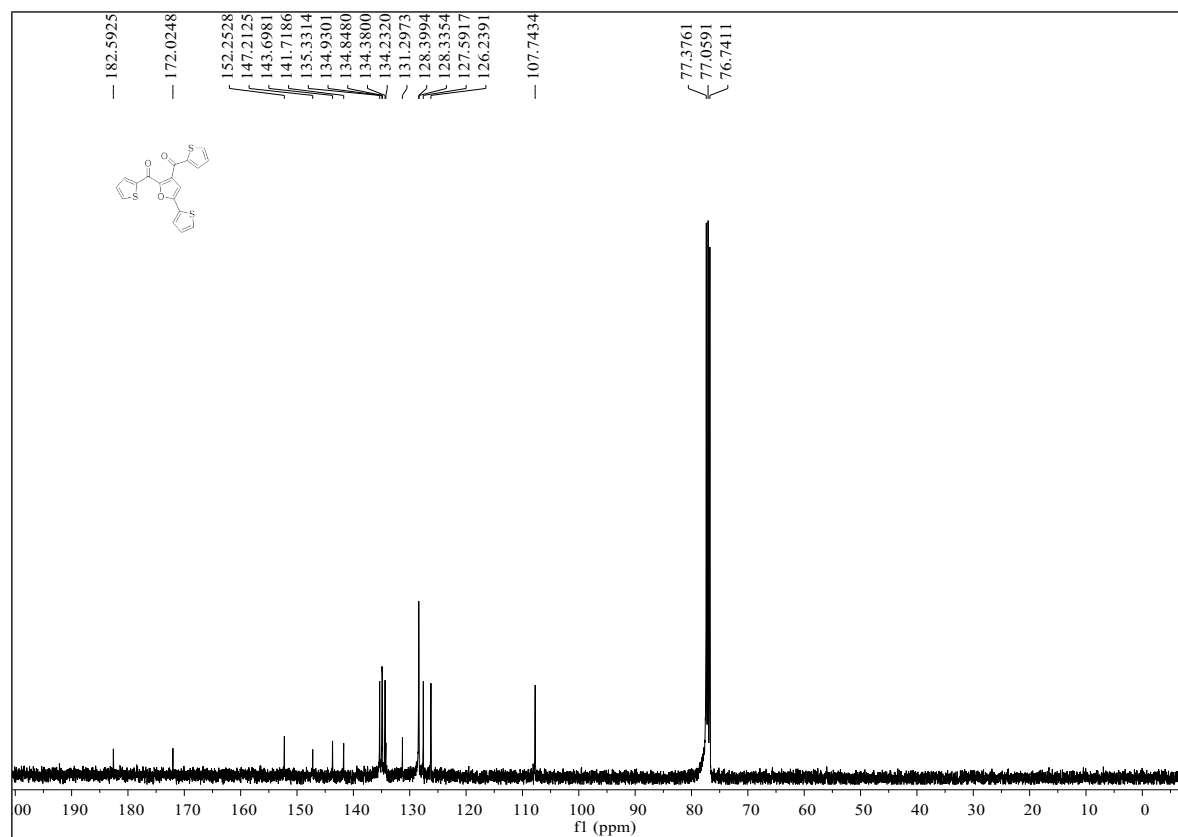

(5-(3-(naphthalen-1-yl)phenyl)furan-2,3-diyl)bis((3-(naphthalen-1-yl)phenyl)methanone) (3)

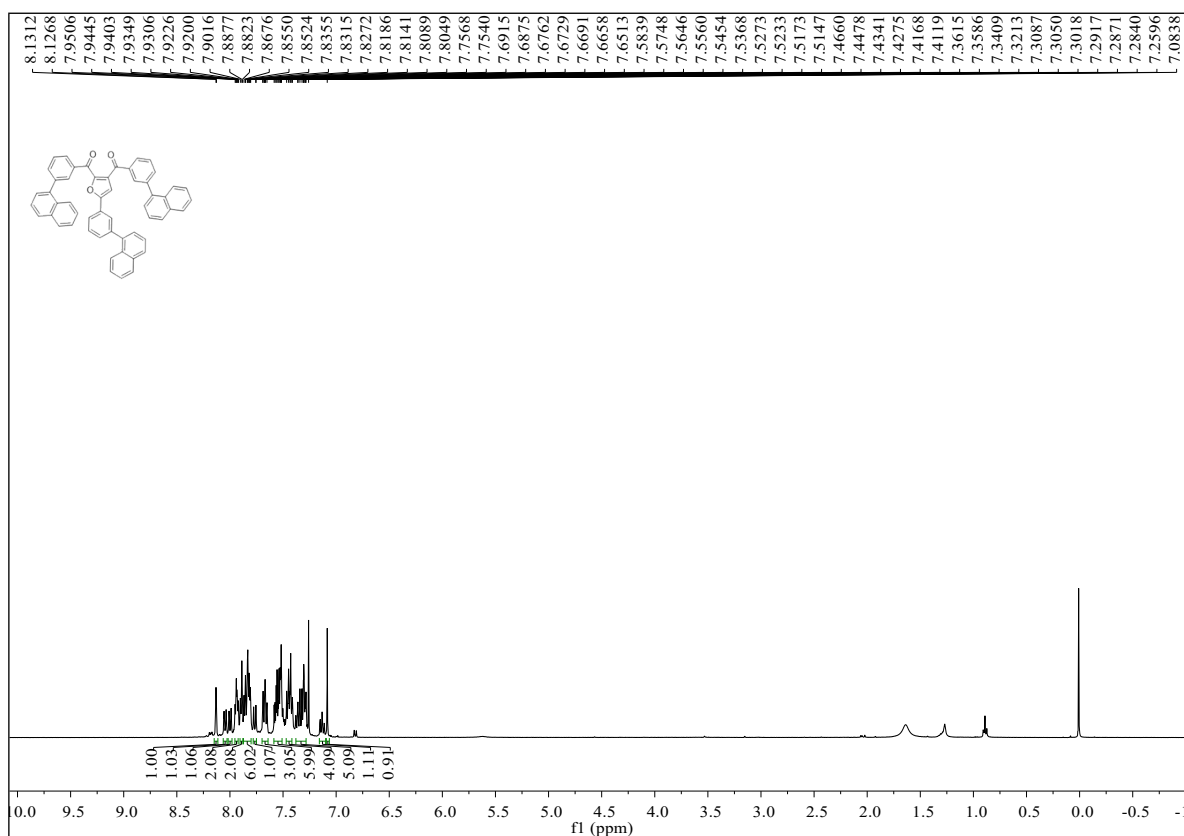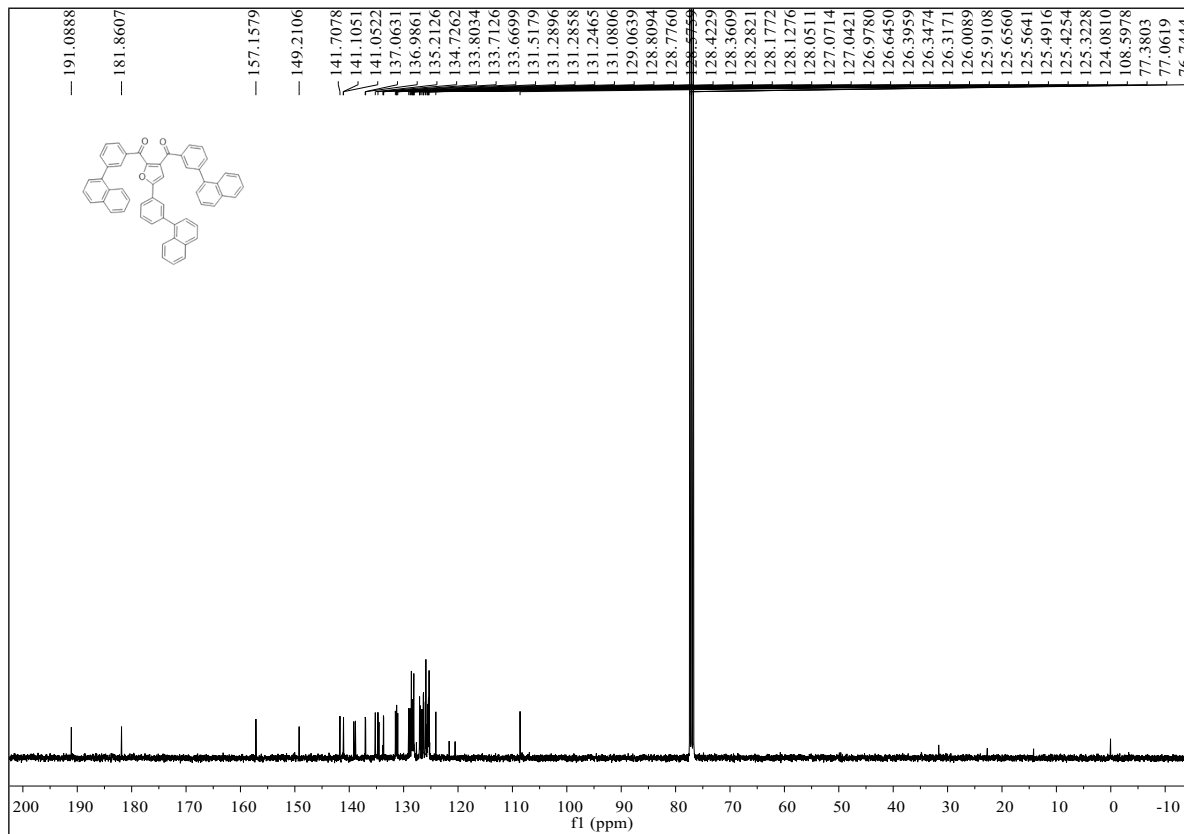

(5-(3-(9H-carbazol-9-yl)phenyl)furan-2,3-diyl)bis((3-(9H-carbazol-9-yl)phenyl)methanone)

(4)

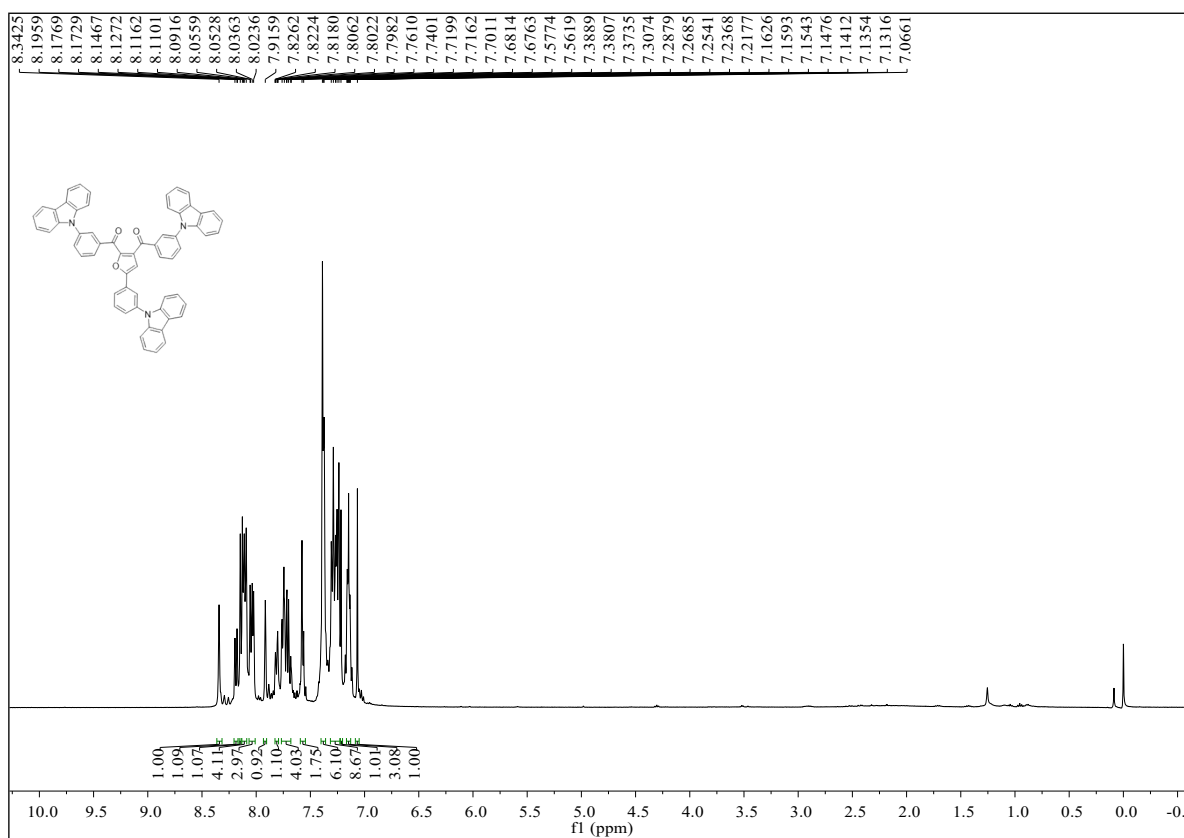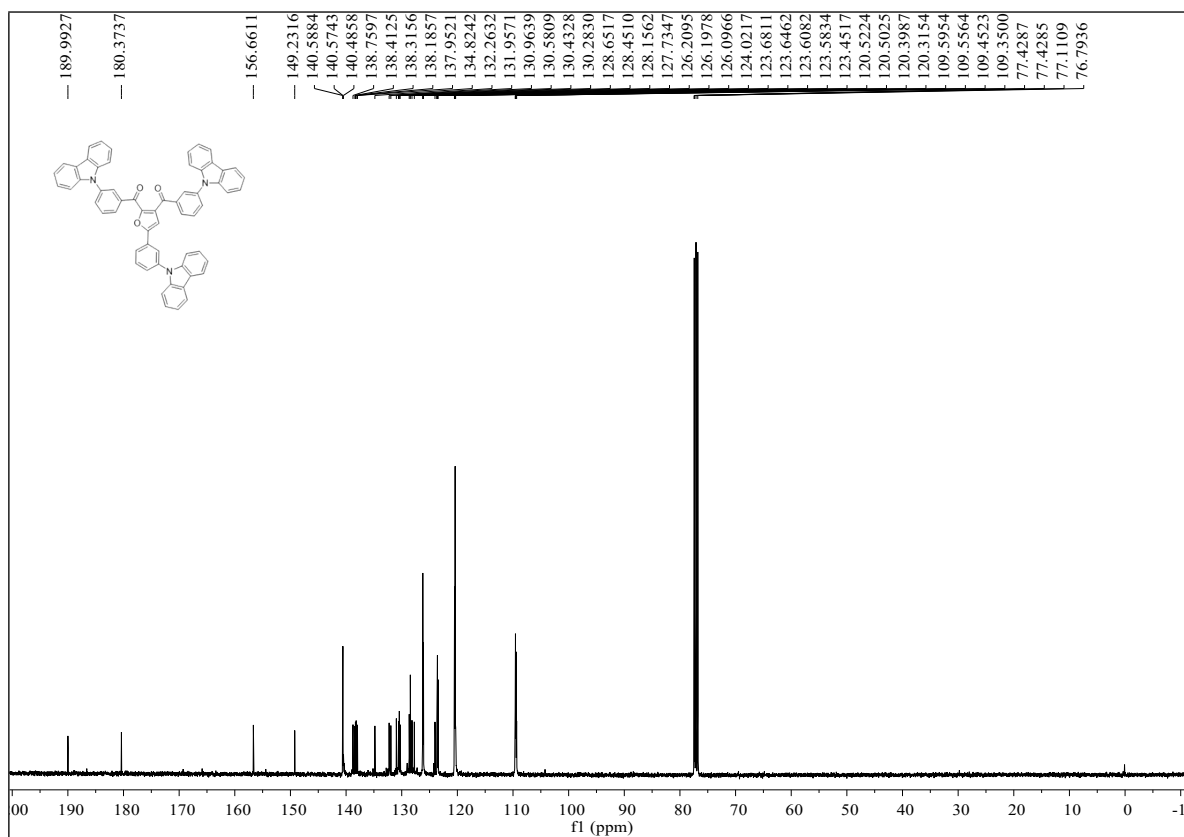

2-(methylsulfonyl)-1-phenyl-2-((2,2,6,6-tetramethylpiperidin-1-yl)oxy)ethan-1-one (A)

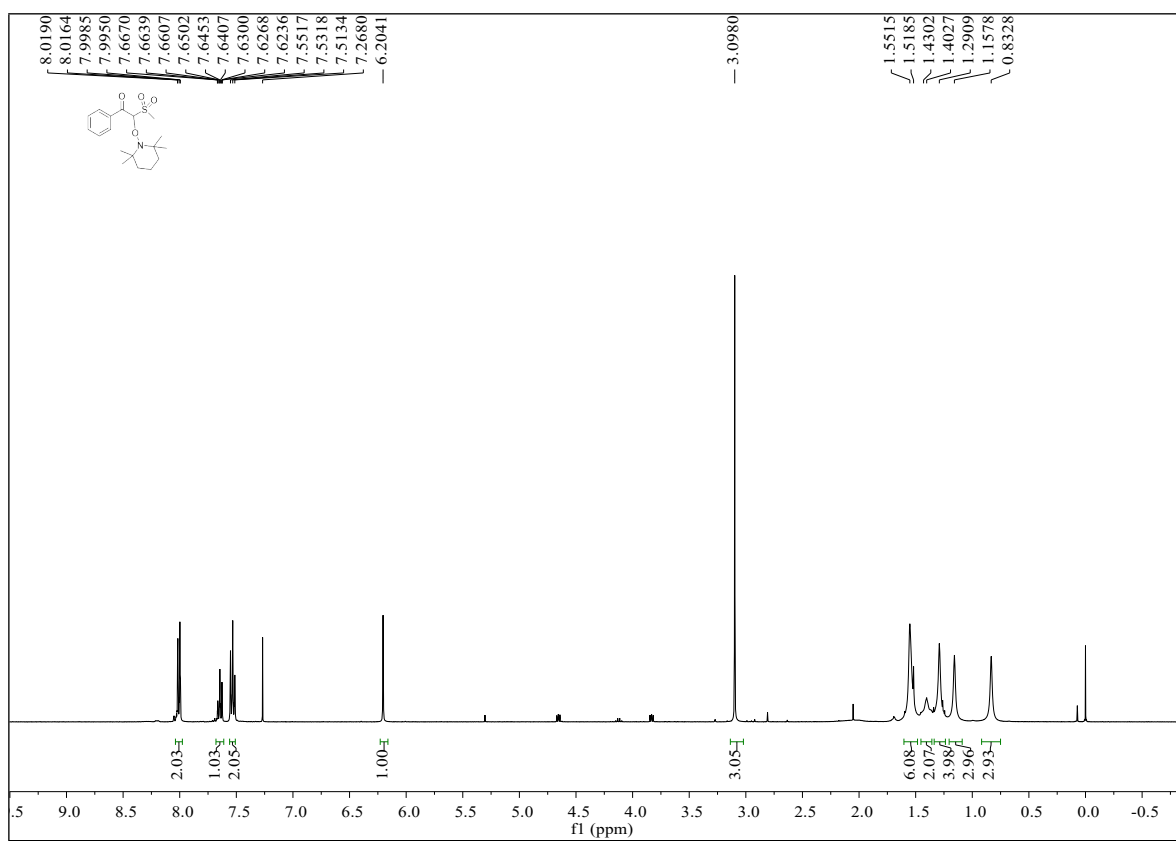

3-(3,5-di-tert-butyl-4-hydroxyphenyl)-2-(methylsulfonyl)-1-phenylpropan-1-one (C)

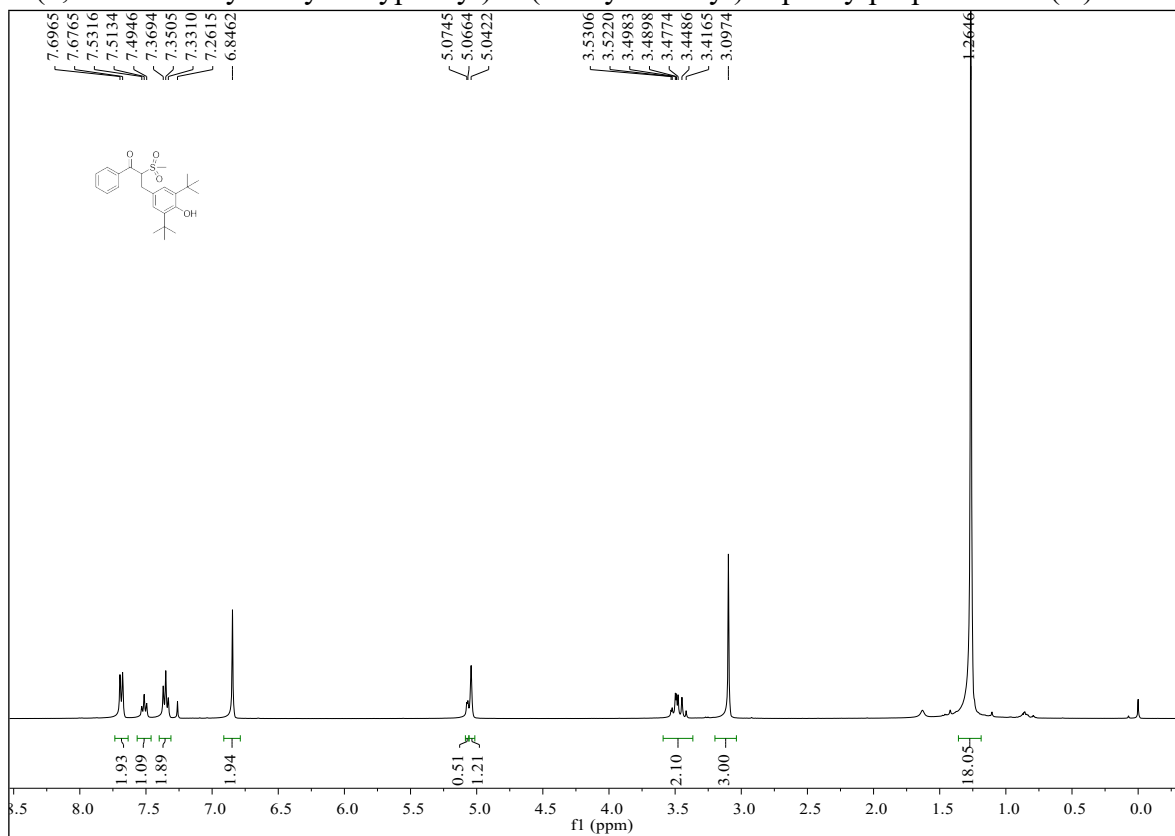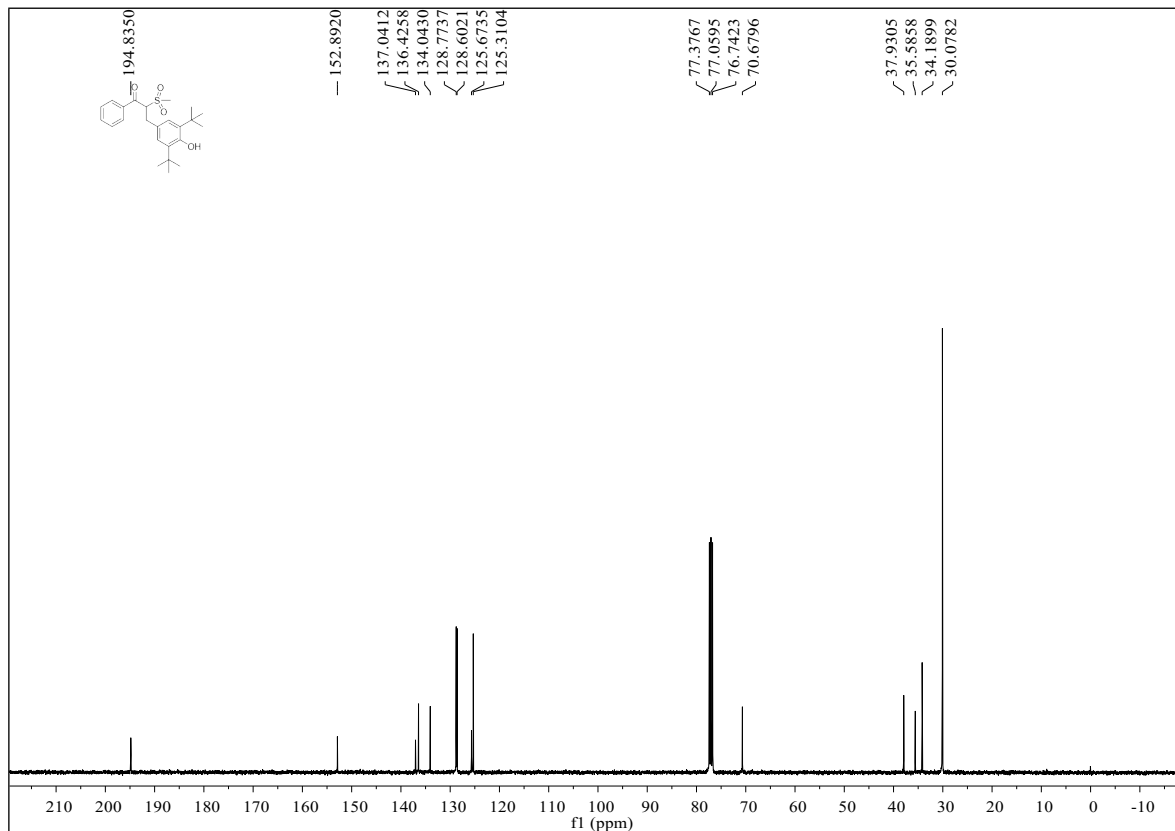

(5-(p-tolyl)furan-2,3-diyl)bis(phenylmethanone) (**5**)

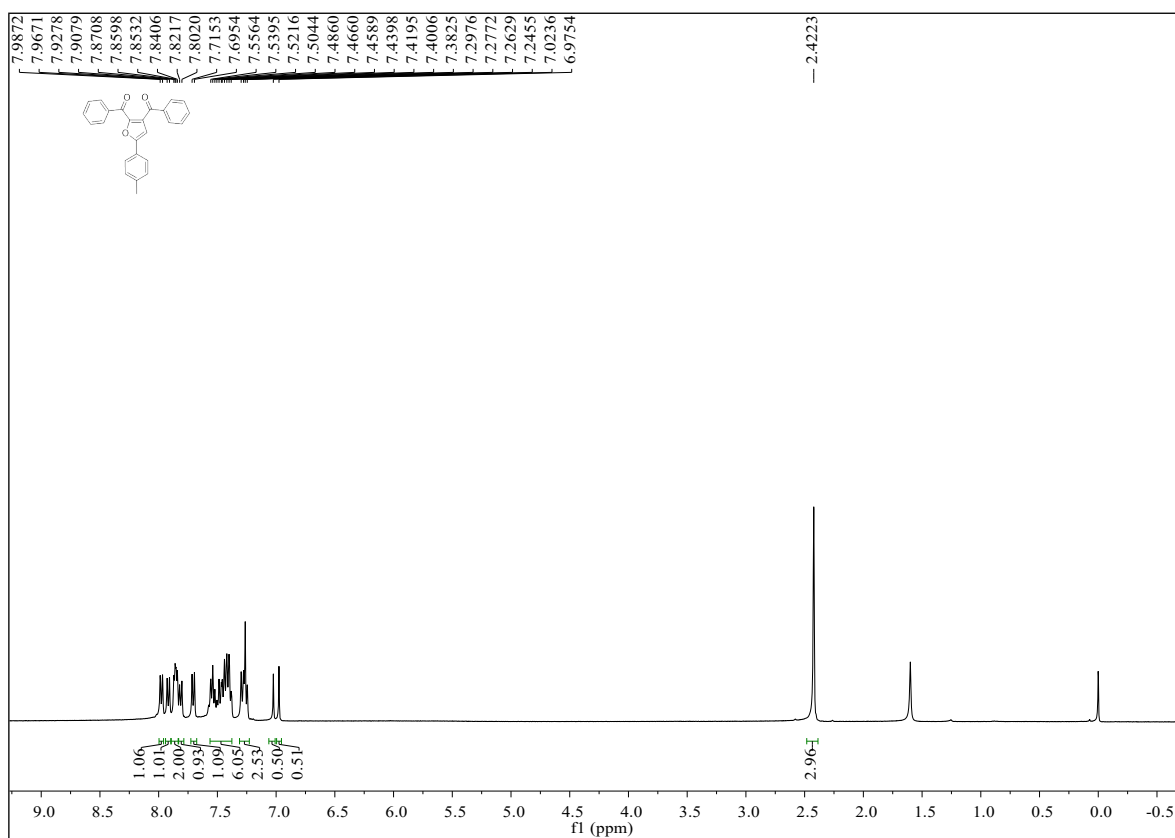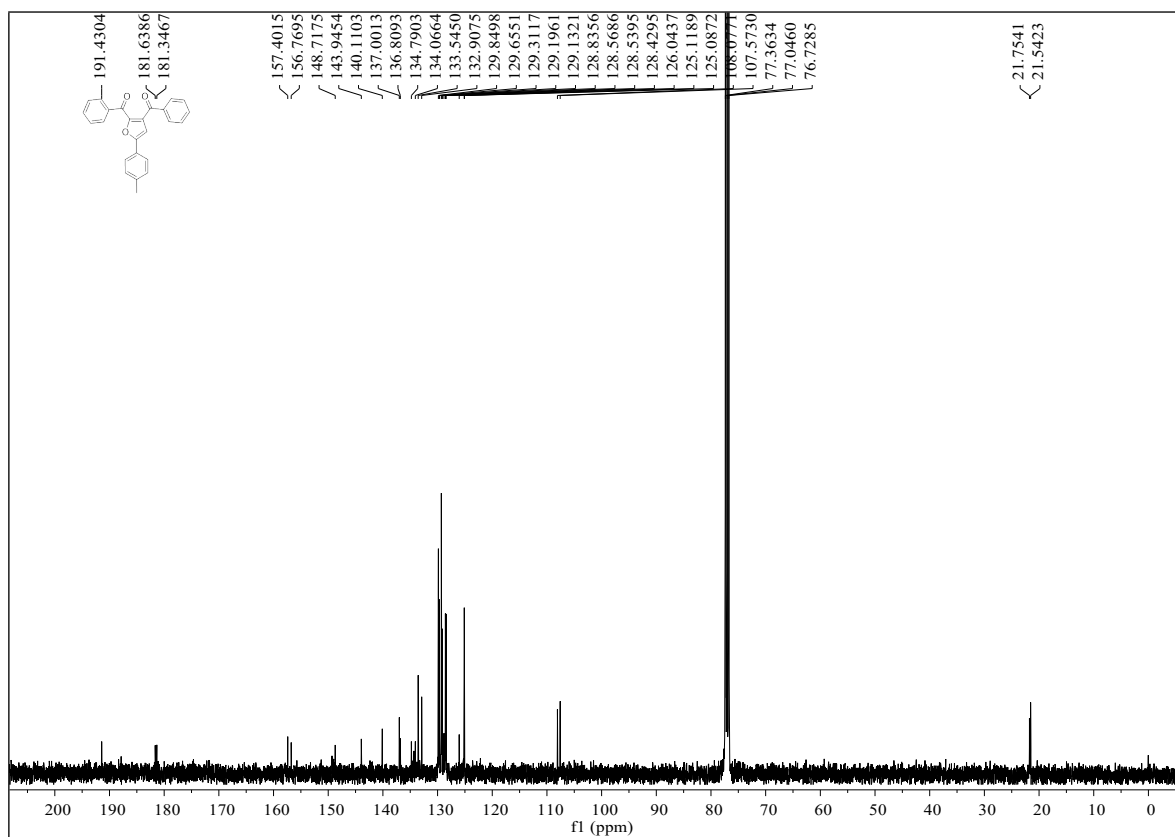

### X-ray single crystal data of 2g

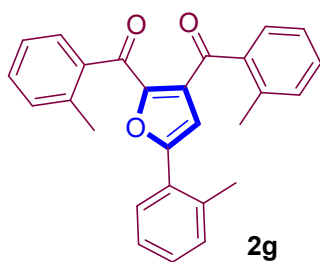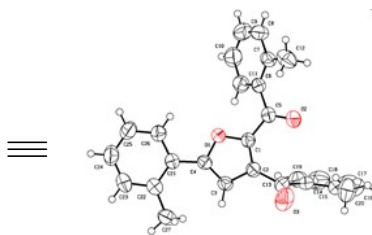

X-ray structure of **2g**  
(CCDC 2292188)

|                                   |                                                                                                          |
|-----------------------------------|----------------------------------------------------------------------------------------------------------|
| Empirical formula                 | C <sub>27</sub> H <sub>22</sub> O <sub>3</sub>                                                           |
| Temperature                       | 300 K                                                                                                    |
| Wavelength                        | 0.71073 Å                                                                                                |
| Unit cell dimensions              | a = 10.9241 (10) Å alpha = 90° .<br>b = 18.1857 (18) Å beta = 115.93°.<br>c = 11.7611 (13) Å gamma = 90° |
| Volume                            | 2101.3(4) Å <sup>3</sup>                                                                                 |
| Z                                 | 4                                                                                                        |
| Calculated density                | 1.247 g/cm <sup>3</sup>                                                                                  |
| Absorption coefficient            | 0.080 mm <sup>-1</sup>                                                                                   |
| F(000)                            | 832.0                                                                                                    |
| Crystal size                      | 0.28 × 0.26 × 0.23 mm <sup>3</sup>                                                                       |
| Theta range for data collection   | 6.106° to 54.982°                                                                                        |
| Reflections collected / unique    | 63696                                                                                                    |
| Data / restraints / parameters    | 4809/0/274                                                                                               |
| Goodness-of-fit on F <sup>2</sup> | 1.017                                                                                                    |
| Final R indices [I > 2sigma(I)]   | R <sub>1</sub> = 0.0539, wR <sub>2</sub> = 0.1039                                                        |
| R indices (all data)              | R <sub>1</sub> = 0.1124, wR <sub>2</sub> = 0.1286                                                        |
